# Supplementary material for: Evaluating the capability of soybean peptides as calcium ion carriers: a study through sequence analysis and molecular dynamics simulations
Source: Royal Society of Chemistry journal article supplement (doi:10.1039/d4ra02916j), 2024-01-01
Supplement: d4ra02916j1.xlsx [file d4ra02916j1.xlsx]

## Sheet: F1
Sequence	Abundance	Gravy	Hydrophobicity (+) Hydrophilicity (-)	Theoretical charge	Cationic (+) Anionic (-)
REGDLIAVPT	1.87666e+09	0.01	-	-1.441	-
FREGDLIAVPT	1.62094e+09	0.26	-	-1.441	-
FPFPRPPHQKEE	1.08248e+09	-1.91	+	-0.404	-
EYVPT	1.06321e+09	-0.58	+	-1.335	-
FGPGGRDPESVL	9.88654e+08	-0.49	+	-1.441	-
PSPPI	8.94973e+08	-0.22	+	-0.099	-
SPPPI	890674307	-0.22	+	-0.747	-
VPPTP	8.87728e+08	-0.26	+	-0.477	-
TIPY	778177152	0.22	-	-0.794	-
AIPEE	751342080	-0.46	+	-2.388	-
EPAIE	751342080	-0.46	+	-2.329	-
EVFPAI	724958907	1.37	-	-1.333	-
VSNGI	711380160	0.8	-	-0.477	-
MRNSI	711380160	-0.48	+	0.285	+
MVSGNI	711380160	0.98	-	-0.715	-
SGDAI	574376128	0.32	-	-1.746	-
GSDAI	574376128	0.32	-	-1.442	-
IIDTN	529508668	0.26	-	-1.442	-
EVISQ	516531200	0.18	-	-1.333	-
IDFVT	503505216	1.46	-	-1.442	-
VEISF	503505216	1.44	-	-1.476	-
MSVISF	503505216	1.97	-	-0.715	-
FDPAIF	420212426	1.13	-	-1.442	-
EVDIF	4.10224e+08	0.9	-	-2.332	-
VEDIF	4.03323e+08	0.9	-	-2.475	-
VDEIF	400658528	0.9	-	-2.475	-
FSLTQN	399145184	-0.32	+	-0.443	-
ELPGGM	373912096	-0.03	+	-1.333	-
PNNTSS	373912096	-1.82	+	-0.099	-
FVEI	358058127	2	-	-1.441	-
FDPAIL	350870624	1.3	-	-1.442	-
MSFE	3.48219e+08	0.1	-	-1.712	-
MFEE	3.42028e+08	-0.58	+	-2.711	-
MEFE	3.41553e+08	-0.58	+	-2.711	-
GERVFDGELQE	3.06824e+08	-1.09	+	-3.437	-
EVDVF	2.80511e+08	0.84	-	-2.332	-
NFREGDLIAVPT	265082306	-0.05	+	-1.441	-
RVSDDEFNNY	255855664	-1.71	+	-2.443	-
STGGP	230832592	-0.78	+	-0.747	-
MVVPI	202995512	2.64	-	-0.715	-
GERVFDGELQEG	1.90305e+08	-1.03	+	-3.439	-
ENGDVI	180859728	-0.37	+	-2.332	-
EVVPV	1.8069e+08	1.5	-	-1.333	-
EDLPEGPAVKIG	172823248	-0.34	+	-2.334	-
SGGCH	158378832	-0.46	+	-0.735	-
KVSIY	156443552	0.54	-	0.552	+
MKGNN	1.48374e+08	-1.88	+	0.282	+
MWNI	148235312	0.5	-	-0.715	-
KVEPE	142554384	-1.66	+	-1.441	-
SEPVVA	142554384	0.72	-	-1.746	-
DNVSI	134712832	0.18	-	-1.442	-
GGDLVS	134712832	0.48	-	-1.442	-
MAPNF	134163680	0.28	-	-0.715	-
NELDKGIGTII	1.26471e+08	0.13	-	-1.443	-
EAAFP	121433568	0.26	-	-1.333	-
DDFF	1.14239e+08	-0.35	+	-2.442	-
EIIGGI	1.10193e+08	1.53	-	-1.333	-
MPATPF	108831408	0.43	-	-0.715	-
RVFDGELQE	108057920	-0.9	+	-2.438	-
LNALPEEVIQH	105720048	-0.06	+	-2.404	-
ISSEDKPFNL	1.02106e+08	-0.65	+	-1.443	-
EVDLKF	101013440	-0.02	+	-1.335	-
DISEGPPAIKL	99412089	-0.06	+	-1.443	-
HAAH	91494152	-0.7	+	-0.369	-
MLSSE	91494152	0.12	-	-1.712	-
FDPASI	91379986	0.53	-	-1.442	-
TWNPNNKPF	90885792	-1.82	+	0.206	+
EQPRPIPFPRPQ	88912673	-1.68	+	0.667	+
EVVII	8.60104e+07	2.78	-	-1.333	-
EIPTP	8.53673e+07	-0.58	+	-1.333	-
EVCELQ	81867112	0	-	-2.356	-
MMPTI	80297576	1.2	-	-0.715	-
DVIGPL	79772456	1.17	-	-1.442	-
VAGIE	78150568	1.32	-	-1.474	-
ERVSDDEFNNY	76539962	-1.87	+	-3.333	-
IEII	74945154	2.5	-	-1.441	-
MGRGW	73826040	-0.86	+	0.285	+
SEDKPFNL	73826040	-1.27	+	-1.748	-
FPFPRPPHQK	73763210	-1.59	+	1.592	+
QDIIVE	71850512	0.45	-	-2.439	-
EAITI	71687648	1.32	-	-1.333	-
IEATI	71687648	1.32	-	-1.441	-
ESNLTV	70502576	-0.08	+	-1.333	-
MIAFRL	70308544	1.72	-	0.285	+
FDFSI	70258456	1.16	-	-1.442	-
KDHTQ	70258456	-2.96	+	-0.408	-
PSEPAQ	70258456	-1.53	+	-1.098	-
EQSSY	68624848	-1.98	+	-1.335	-
QEYSS	68624848	-1.98	+	-1.444	-
AGEYSS	68624848	-0.83	+	-1.394	-
KGGSTP	68378040	-1.3	+	0.555	+
EVIVIS	64433936	2.18	-	-1.333	-
FDIVV	63258224	2.44	-	-1.442	-
PIYSI	63258224	1.06	-	-0.101	-
EVIIL	63085980	2.7	-	-1.333	-
DSNGSF	62714220	-1.03	+	-1.442	-
SNGDSF	62714220	-1.03	+	-1.746	-
MPSGR	62486576	-1.08	+	0.285	+
MVSVE	6.19499e+07	1.2	-	-1.712	-
QPFEVE	61292904	-0.85	+	-2.438	-
KNGGGS	59136120	-1.57	+	0.555	+
HALQTP	59110148	-0.57	+	-0.406	-
MSVIL	5.70074e+07	2.72	-	-0.715	-
EAVE	56268420	-0.25	+	-2.329	-
NSLTLPALR	55914600	0.23	-	0.557	+
YNNEDTPVVAV	55710048	-0.29	+	-2.443	-
ESNFLE	55403044	-0.78	+	-2.329	-
MDLGVS	54652416	0.87	-	-1.715	-
QYEPA	53523700	-1.62	+	-1.444	-
EGGPFT	53523700	-0.63	+	-1.333	-
GFTPDA	53523700	-0.27	+	-1.442	-
EVVF	5.3063e+07	1.93	-	-1.333	-
TAIVTP	52698236	1.25	-	-0.792	-
GVAIEI	52698236	1.85	-	-1.441	-
IAGVEL	52698236	1.73	-	-1.441	-
EVVSI	5.22539e+07	1.72	-	-1.333	-
EEDKDFETR	5.13475e+07	-2.64	+	-3.332	-
VDISI	5.0883e+07	1.78	-	-1.476	-
ISVDI	50273988	1.78	-	-1.442	-
MATLSL	50273988	1.63	-	-0.715	-
EGDI	50273727	-0.73	+	-2.332	-
SVAPIP	50243944	1.08	-	-0.747	-
SVAPPI	50243944	1.08	-	-0.747	-
SPPGIL	50243944	0.65	-	-0.747	-
FPFPRPPHQKE	5.01534e+07	-1.76	+	0.595	+
VTIVE	50025652	1.74	-	-1.474	-
EVFNPQ	49493708	-0.85	+	-1.333	-
DTAAH	48632020	-0.76	+	-1.405	-
KSTQ	47934648	-2.23	+	0.555	+
IVPQNFVVAAR	44140056	0.95	-	0.557	+
EITPEKNPQ	44125744	-1.92	+	-1.334	-
EVIVSL	4.32791e+07	2.07	-	-1.333	-
FDLIAF	42965864	2.03	-	-1.442	-
QGLEEP	42034352	-1.45	+	-2.44	-
EILI	41401238	2.33	-	-1.333	-
KGNPT	40993184	-2.02	+	0.555	+
DPVSST	40548472	-0.53	+	-1.442	-
EGVE	40254356	-0.8	+	-2.329	-
HEIYEH	39434304	-1.7	+	-2.37	-
REEQEH	39434304	-3.62	+	-2.403	-
HEEEQR	39434304	-3.62	+	-2.403	-
PGPTF	39363620	-0.3	+	-0.099	-
AGNPDIEHPE	39261800	-1.45	+	-3.351	-
MEVII	3.82162e+07	2.32	-	-1.714	-
EEPQQPQQR	38138100	-3.19	+	-1.332	-
MQYK	37859896	-1.7	+	0.28	+
MVPWN	37721204	0.02	-	-0.715	-
VTIYP	36271040	1.02	-	-0.479	-
MLELI	3.55863e+07	2.1	-	-1.714	-
TVMI	35449000	2.48	-	-0.792	-
MLGTF	35449000	1.48	-	-0.715	-
EDGIGA	34796740	-0.25	+	-2.332	-
FDPAAL	34189360	0.85	-	-1.442	-
EVIVVT	34017796	2.15	-	-1.333	-
VIVTLD	34017796	2.08	-	-1.475	-
VIEVLS	34017796	2.07	-	-1.476	-
QVEISF	33801512	0.62	-	-1.441	-
PAVGAP	33487262	0.7	-	-0.099	-
EDGSLF	3.34005e+07	-0.27	+	-2.332	-
IDII	3.32653e+07	2.5	-	-1.442	-
VIVEISKEQIR	3.29216e+07	0.2	-	-0.477	-
FIVPE	32589924	1.28	-	-1.439	-
EVIMI	32589924	2.32	-	-1.333	-
FIEVP	32589924	1.28	-	-1.441	-
FDFI	32427916	1.65	-	-1.442	-
MLSIL	31507304	2.64	-	-0.715	-
MTVIL	31507304	2.74	-	-0.715	-
FEEINKVL	31458222	0.11	-	-1.443	-
VFDGELQEGRVL	30957524	-0.04	+	-2.474	-
FLDVIP	30335662	1.7	-	-1.442	-
ELAPMP	30314748	0.13	-	-1.333	-
DMVMP	30276706	0.58	-	-1.442	-
DVMMP	30276706	0.58	-	-1.442	-
EVLPTY	3.02577e+07	0.15	-	-1.335	-
MKSSR	30205840	-1.62	+	1.282	+
VDEVLF	29929238	1.33	-	-2.475	-
IPTTY	29928628	0.04	-	-0.445	-
EVVTF	29928628	1.4	-	-1.333	-
ALPEEVIQHTF	2.96217e+07	0.1	-	-2.353	-
GFAPE	29591714	-0.18	+	-1.439	-
CNGERVFDGEL	2.93002e+07	-0.55	+	-2.464	-
ITIIP	2.87945e+07	2.24	-	-0.443	-
FDITI	28625444	1.52	-	-1.442	-
EVIPI	2.8577e+07	1.62	-	-1.333	-
EVIVF	2.79316e+07	2.44	-	-1.333	-
EVGAFL	27651940	1.45	-	-1.333	-
VAGELF	27651940	1.45	-	-1.476	-
EVPII	2.70514e+07	1.62	-	-1.333	-
VSDINE	26929726	-0.43	+	-2.473	-
ENTCMR	26527992	-1.3	+	-0.357	-
IPVPSI	26276954	1.53	-	-0.443	-
VIVEISKE	26227846	0.71	-	-1.475	-
VVNPDNNENLRL	2.6041e+07	-0.92	+	-1.475	-
IQDKVTIDGYE	25981906	-0.65	+	-2.443	-
CNGERVFDGELQ	25952338	-0.79	+	-2.464	-
SEVVGI	25545102	1.37	-	-1.746	-
TVGVVE	25545102	1.33	-	-1.788	-
QEPIE	25512796	-1.52	+	-2.438	-
VIVEISKEQIRA	2.54706e+07	0.33	-	-0.477	-
EVQMPQ	25405510	-1	+	-1.333	-
DTKFEEINKVLF	25379610	-0.37	+	-1.445	-
MAPVLP	25176164	1.42	-	-0.715	-
VSEIVE	24771522	0.85	-	-2.473	-
EIAPVE	24512422	0.32	-	-2.329	-
FPDGII	24473988	1.05	-	-1.442	-
DKPNGPVWRIS	2.42993e+07	-1.09	+	0.555	+
EVNI	2.41828e+07	0.43	-	-1.333	-
FPEVI	24127766	1.28	-	-1.441	-
AIPIGDLPEDKL	2.40444e+07	0.03	-	-2.393	-
DIGGFF	2.38697e+07	0.97	-	-1.442	-
MIDIL	23823694	2.24	-	-1.715	-
EVTN	23816160	-0.88	+	-1.333	-
ESIN	23816160	-0.82	+	-1.333	-
MSSIN	23816160	0.26	-	-0.715	-
MEVSQ	23816160	-0.34	+	-1.714	-
MCLDII	23789423	2.28	-	-1.739	-
FEITPE	23761900	-0.33	+	-2.438	-
REGDLIAVPTG	23739028	-0.03	+	-1.441	-
LPSYSPYPR	23498040	-1.08	+	0.552	+
RDIIYR	23320856	-0.8	+	0.555	+
LLDTGG	23283246	0.43	-	-1.442	-
EQEPEQ	23053220	-3.18	+	-3.33	-
NPFKF	22530148	-0.68	+	0.555	+
ITAIE	22302430	1.32	-	-1.439	-
EGEI	22140870	-0.73	+	-2.331	-
MEAVE	22140870	0.18	-	-2.711	-
MATLSF	22035224	1.47	-	-0.715	-
IDIPI	21871370	1.68	-	-1.442	-
EVISVL	2.18465e+07	2.07	-	-1.333	-
MAIPF	2.18442e+07	1.88	-	-0.715	-
NALPEEVIQHTF	21802656	-0.2	+	-2.404	-
WDPDF	21439144	-1.34	+	-2.442	-
EVGMPM	21439144	0.42	-	-1.333	-
FDEPF	2.11792e+07	-0.6	+	-2.441	-
DLPSVP	21062102	0.08	-	-1.442	-
EVVSPP	21062102	0.15	-	-1.333	-
GDSPK	21056404	-2.04	+	-0.445	-
EPIE	20789796	-1.02	+	-2.329	-
EPEI	20789796	-1.02	+	-2.331	-
RAAR	20684940	-1.35	+	1.557	+
YVGTP	2.06445e+07	0.04	-	-0.445	-
IGGIEP	2.03686e+07	0.52	-	-1.441	-
VPDII	2.02784e+07	1.62	-	-1.476	-
FINGV	20102586	1.52	-	-0.443	-
EVAMP	19878322	0.56	-	-1.333	-
AIGRR	19684768	-0.62	+	1.608	+
EEFE	1.94675e+07	-1.93	+	-3.328	-
KDEVVV	19236888	0.28	-	-1.443	-
VIGAH	19223192	1.38	-	-0.44	-
MQLVH	19223192	0.64	-	-0.678	-
EDVT	18990888	-0.88	+	-2.332	-
MSSVE	18990888	0.2	-	-1.712	-
VGPDDDEKSWLQ	18744960	-1.42	+	-3.477	-
ESEIEE	18703250	-1.72	+	-4.327	-
KGPREADGIVDY	1.8662e+07	-1.01	+	-1.446	-
FVIPAF	18577474	2.42	-	-0.443	-
ELGGPI	1.85557e+07	0.4	-	-1.333	-
SEESEDSELR	18313280	-2.06	+	-4.742	-
GLHLPSYSPYP	18310756	-0.45	+	-0.411	-
EVGII	1.83094e+07	1.86	-	-1.333	-
VDINEGALLLPH	1.83083e+07	0.52	-	-2.439	-
EVVEN	18304868	-0.42	+	-2.331	-
FDNIF	1.82925e+07	0.62	-	-1.442	-
KDVFRAIP	18256022	-0.03	+	0.555	+
EIINP	18244254	0.08	-	-1.333	-
EIIGGP	18244254	0.52	-	-1.333	-
MDLPLL	18164820	1.37	-	-1.715	-
IDGFVL	18054474	1.9	-	-1.442	-
FREGDLIAVP	17854754	0.36	-	-1.441	-
FDVIQ	17786216	0.9	-	-1.442	-
EEDEDEEQQRE	17679302	-3.59	+	-7.324	-
MGRIS	17577242	0.14	-	0.285	+
KFNIFF	17577028	0.92	-	0.555	+
KIQDKVTID	17524036	-0.64	+	-0.445	-
TPIDIY	17185478	0.32	-	-1.794	-
IDFI	17053769	2.08	-	-1.442	-
TEVGPDDDEKSW	1.69101e+07	-1.8	+	-4.791	-
EVAII	1.68989e+07	2.3	-	-1.333	-
IDFGGF	16875270	0.97	-	-1.442	-
FLDGGF	16875270	0.85	-	-1.442	-
YPAAAY	16875270	0.2	-	-0.448	-
KTGGH	16866708	-1.72	+	0.592	+
QPLDPQ	16799138	-1.65	+	-1.442	-
QSAEPQ	16778614	-1.85	+	-1.441	-
EVIAI	16723633	2.3	-	-1.333	-
MGKSSL	16694709	-0.03	+	0.282	+
EIAW	16461491	0.47	-	-1.333	-
KGGEQ	16461491	-2.34	+	-0.444	-
EVVVF	1.6381e+07	2.38	-	-1.333	-
FGELTP	16377166	0.07	-	-1.441	-
MANPF	16334499	0.28	-	-0.715	-
SVIVEISKE	16330932	0.54	-	-1.745	-
EDLPEGPAVKI	1.62879e+07	-0.34	+	-2.334	-
PAFDEF	16201944	-0.2	+	-2.097	-
EIAVI	1.5965e+07	2.3	-	-1.333	-
MELSPE	15910480	-0.62	+	-2.711	-
LELPAP	15899940	0.45	-	-1.441	-
MSEEE	15767818	-1.88	+	-3.71	-
PEEFAL	15694326	-0.03	+	-2.096	-
MLTILR	15660882	1.47	-	0.285	+
EDAI	15658406	-0.18	+	-2.332	-
KSDP	15591738	-2.45	+	-0.445	-
HEGGIKLPTE	15383619	-0.89	+	-1.404	-
EEPQQPQQRGQ	15378842	-2.96	+	-1.332	-
FDII	15332674	2.08	-	-1.442	-
MDPVP	1.53034e+07	-0.12	+	-1.715	-
ELPEWTDIVKT	15245192	-0.53	+	-2.334	-
KWEFFP	15234068	-0.72	+	-0.444	-
QAPY	15233378	-1.15	+	-0.445	-
PVDI	15228646	0.9	-	-1.098	-
MFDVL	1.52254e+07	1.84	-	-1.715	-
WKINIP	15180702	-0.15	+	0.555	+
MGNCQ	15138474	-0.6	+	-0.74	-
MKFQ	1.50972e+07	-0.68	+	0.282	+
IIVPE	15085385	1.62	-	-1.439	-
ISPK	15024773	-0.45	+	0.555	+
WAFLP	14959677	1.18	-	-0.443	-
RQFPFPRPPH	1.48519e+07	-1.65	+	1.594	+
YEGVIL	14757468	1.22	-	-1.444	-
LLNALPEEVIQH	14729957	0.26	-	-2.404	-
NILEASYDTK	14529915	-0.71	+	-1.446	-
EVGIII	1.4287e+07	2.3	-	-1.333	-
MEVALL	1.40982e+07	2	-	-1.714	-
SIIDI	1.39841e+07	1.84	-	-1.746	-
WGEQ	13485358	-2.08	+	-1.441	-
PTYVI	13456838	1.02	-	-0.101	-
QEEQRE	13440493	-3.67	+	-2.437	-
QREEQE	13440493	-3.67	+	-2.437	-
ISAMI	13422091	2.38	-	-0.443	-
MEAPI	13340741	0.62	-	-1.714	-
MKNGI	1.33392e+07	-0.28	+	0.282	+
EVAIVL	13338186	2.5	-	-1.333	-
FIDP	12888581	0.55	-	-1.442	-
EVGVSI	12865415	1.37	-	-1.333	-
DIGFDE	12802248	-0.6	+	-3.438	-
IDGFDE	12802248	-0.6	+	-3.438	-
TVIDI	12636304	1.8	-	-1.791	-
FVDLVQ	12603799	1.33	-	-1.442	-
IIDI	12561473	2.5	-	-1.442	-
MLVSL	12561473	2.58	-	-0.715	-
EVIMP	12437677	1.1	-	-1.333	-
IPVVE	12365137	1.56	-	-1.439	-
VVPEI	12365137	1.56	-	-1.476	-
DEGEQPRPFPFP	12293517	-1.64	+	-2.44	-
ISPPVP	12279883	0.52	-	-0.443	-
VPPVTP	12279883	0.48	-	-0.477	-
FDNVDI	12278731	0.17	-	-2.442	-
EGGAK	12254280	-1.28	+	-0.335	-
YHRWFL	12254280	-0.55	+	0.592	+
EIAVSL	12061884	1.67	-	-1.333	-
FEPF	12028693	0.12	-	-1.441	-
DERQFPFPRPP	1.20039e+07	-1.85	+	-0.441	-
IIIP	1.18734e+07	2.98	-	-0.443	-
QPRPIPFPRPQ	1.1862e+07	-1.52	+	1.557	+
MIWI	11835030	2.5	-	-0.715	-
MLGKN	11835030	-0.42	+	0.282	+
MNKGI	11835030	-0.28	+	0.282	+
WSRVQ	11796170	-1.1	+	0.557	+
EVGFI	11674126	1.52	-	-1.333	-
EVFGI	11674126	1.52	-	-1.333	-
KPPNP	11664387	-2.44	+	0.555	+
VMGGP	11620595	0.74	-	-0.477	-
IDTS	11408336	-0.12	+	-1.442	-
TTISPY	11394903	-0.1	+	-0.794	-
VVEIPKDELKGL	1.12574e+07	0.02	-	-1.479	-
FEAIT	11256501	0.98	-	-1.441	-
EVSIVI	1.11964e+07	2.18	-	-1.333	-
KGFPN	11163539	-1.32	+	0.555	+
ITAELY	11160654	0.77	-	-1.444	-
YVSLDL	11160654	1.03	-	-1.445	-
MLEGLL	11126238	1.57	-	-1.714	-
GVAFF	11089035	2.24	-	-0.443	-
EVIGPL	1.10612e+07	1.17	-	-1.333	-
PSEIEE	11017836	-1.4	+	-3.093	-
IVDKN	1.09804e+07	-0.44	+	-0.445	-
KGGMQ	10910046	-1.26	+	0.555	+
NDFE	10900332	-1.93	+	-2.439	-
EIVPI	1.08324e+07	1.62	-	-1.333	-
ADFYNPKAGRIS	1.08012e+07	-0.72	+	0.603	+
TISSEDKPFNL	10794184	-0.65	+	-1.793	-
SEDEPFNLR	10742840	-1.59	+	-2.744	-
WWMI	10533289	1.15	-	-0.443	-
SPSTPF	10533289	-0.45	+	-0.747	-
MKRE	1.04306e+07	-2.5	+	0.286	+
MEGDI	1.04095e+07	-0.2	+	-2.714	-
EEDKDFSTR	1.03232e+07	-2.34	+	-2.333	-
NEGEDKGAIVT	10264568	-0.81	+	-2.442	-
IESIML	10260570	1.73	-	-1.441	-
VEDVIF	10260570	1.45	-	-2.475	-
ESGI	1.02488e+07	-0.05	+	-1.333	-
EDSSEI	10222165	-1.27	+	-3.331	-
MRNGSD	10222165	-1.8	+	-0.713	-
FDPI	1.02098e+07	0.55	-	-1.442	-
VADII	10207271	2.3	-	-1.476	-
SDNFEYVSFK	10176917	-0.75	+	-1.75	-
EVGE	10151571	-0.8	+	-2.329	-
MEGVE	10151571	-0.26	+	-2.711	-
PGITIGDTIPDL	10138168	0.41	-	-2.098	-
GIDVVI	10039658	2.25	-	-1.442	-
EVVSPI	10002637	1.17	-	-1.333	-
MGSIR	9954336	0.14	-	0.285	+
MEVLTL	9.95296e+06	1.58	-	-1.714	-
WEAVLE	9905317	0.32	-	-2.438	-
VDIF	9.90348e+06	2	-	-1.476	-
FDDIF	9822284	0.62	-	-2.442	-
KTNDRPSIG	9795135	-1.6	+	0.555	+
AIEVI	9786010	2.3	-	-1.391	-
IEGII	9786010	1.92	-	-1.441	-
EIVAI	9786010	2.3	-	-1.333	-
ENSIE	9732554	-1.36	+	-2.329	-
ESINE	9732554	-1.36	+	-2.329	-
FISIR	9701020	1.3	-	0.557	+
ITRFV	9701020	1.26	-	0.557	+
KGGVKF	9701020	-0.27	+	1.552	+
SIIDPGDSDIIK	9687615	0	+	-2.748	-
EVVVPE	9.65213e+06	0.67	-	-2.329	-
GNGGPF	9648235	-0.58	+	-0.443	-
RGGGSD	9648235	-1.67	+	-0.441	-
RQFPFPRPPHQ	9.64243e+06	-1.82	+	1.594	+
MTTTT	9.61016e+06	-0.18	+	-0.715	-
ELPEWTDIVK	9602194	-0.51	+	-2.334	-
MEVTVF	9496519	1.48	-	-1.714	-
VPVDLVIDH	9448731	1.01	-	-2.439	-
TIIMI	9419953	2.94	-	-0.792	-
MAFTLL	9419953	2.23	-	-0.715	-
EIEIAP	9343444	0.37	-	-2.331	-
ELEAIP	9343444	0.25	-	-2.331	-
KMAPPQ	9343444	-1.15	+	0.555	+
FICGFF	9257720	2.5	-	-0.467	-
VVWMI	9249975	2.78	-	-0.477	-
EVVTVI	9230939	2.15	-	-1.333	-
LTVDVL	9230939	1.97	-	-1.442	-
VSLEVI	9230939	2.07	-	-1.476	-
ISVDLI	9230939	2.12	-	-1.442	-
FECSC	9202071	0.7	-	-1.49	-
MDPGR	9200633	-1.62	+	-0.715	-
IDFGI	9112120	1.58	-	-1.442	-
EEPF	9.06461e+06	-1.45	+	-2.331	-
FDIDF	9060870	0.62	-	-2.442	-
VSIEI	9051236	1.78	-	-1.476	-
LENSLPKPYLPR	9044173	-0.91	+	0.554	+
VPATP	9021400	0.42	-	-0.477	-
FDGVI	8970205	1.52	-	-1.442	-
VEGVIF	8948820	1.97	-	-1.476	-
FEDNAGVIVNPK	8.93273e+06	-0.2	+	-1.443	-
KGTGA	8881222	-0.72	+	0.555	+
YDDVY	8874816	-1.08	+	-2.447	-
MMEAP	8.8461e+06	0.1	-	-1.714	-
VTVMP	8828435	1.6	-	-0.477	-
RDIDPY	8795629	-1.65	+	-1.444	-
TIYP	8781972	0.22	-	-0.794	-
MTLMI	8781972	2.28	-	-0.715	-
MAITF	8781972	2.06	-	-0.715	-
EVIAVP	8752588	1.6	-	-1.333	-
NVFEDPDGLKEQ	8711570	-1.34	+	-3.442	-
HEEQDENPYIF	8.70298e+06	-1.8	+	-4.405	-
MWEVL	8.61475e+06	1.1	-	-1.714	-
GTAIE	8565949	0.34	-	-1.439	-
KVVPTE	8559844	-0.22	+	-0.442	-
KGIFF	8538653	1.16	-	0.555	+
KAVFF	8538653	1.54	-	0.555	+
MSESAE	8534893	-0.82	+	-2.711	-
EGLTPQ	8534668	-0.98	+	-1.333	-
EDGVSE	8517541	-1.25	+	-3.329	-
EVTPY	8482616	-0.58	+	-1.335	-
EEAIF	8482616	0.42	-	-2.331	-
DFGSVF	8.43941e+06	0.85	-	-1.442	-
EIDGA	8428346	-0.22	+	-2.332	-
EVIDF	8417344	0.9	-	-2.332	-
GARQLEENLVVF	8.40952e+06	0.14	-	-1.44	-
SVLVEY	8405438	1.1	-	-1.748	-
PLAEIQ	8.38114e+06	0.25	-	-1.098	-
MSCE	8.34927e+06	0.02	-	-1.736	-
VPPTY	8.34703e+06	-0.2	+	-0.479	-
EFAPL	8.34703e+06	0.66	-	-1.333	-
EIVVQ	8.30505e+06	1.18	-	-1.333	-
EVAGVI	8.30505e+06	1.8	-	-1.333	-
EVIGGI	8.30505e+06	1.48	-	-1.333	-
FEVEF	8.24352e+06	0.56	-	-2.44	-
PDIF	8190939	0.55	-	-1.098	-
EVGGAP	8.13198e+06	0.02	-	-1.333	-
KDAAEF	8.10327e+06	-0.75	+	-1.443	-
KGDPQ	8.07168e+06	-2.58	+	-0.445	-
SPPMI	8.07168e+06	0.48	-	-0.747	-
DFPEQNYIVK	8.03192e+06	-0.93	+	-1.446	-
MWLII	8016606	2.76	-	-0.715	-
KGGGLI	8016606	0.53	-	0.555	+
PPGVR	8.00551e+06	-0.78	+	0.901	+
ELFV	8001173	1.82	-	-1.333	-
ISIEAP	7963442	0.82	-	-1.441	-
ATPF	7.95336e+06	0.57	-	-0.392	-
FIKGF	7.8538e+06	1.16	-	0.555	+
MDSNG	7.83238e+06	-1.26	+	-1.715	-
LGEEEEQRQ	7.81034e+06	-2.46	+	-3.438	-
MWVELL	7771557	1.55	-	-1.714	-
YVPAPL	7771557	0.88	-	-0.445	-
KDMEP	7.75925e+06	-2.12	+	-1.443	-
EPSVPT	7.75701e+06	-0.67	+	-1.333	-
SNGPI	7.71127e+06	-0.36	+	-0.747	-
PATGAA	7.71127e+06	0.45	-	-0.099	-
PVVMG	7701090	1.66	-	-0.099	-
KDPGQDPFTF	7686355	-1.31	+	-1.444	-
VALEI	7.68558e+06	2.16	-	-1.476	-
QTAQG	7.66995e+06	-1.26	+	-0.443	-
KMVMQ	7.63142e+06	0.12	-	0.555	+
PDIEHPE	7.55708e+06	-1.77	+	-3.057	-
EGIE	7.55142e+06	-0.72	+	-2.329	-
FDGSP	7.52285e+06	-0.7	+	-1.442	-
DVGGGP	7520179	-0.35	+	-1.442	-
EELGA	7515711	-0.36	+	-2.331	-
EVGDIF	7.51432e+06	0.68	-	-2.332	-
DHPRKF	7.48405e+06	-2.32	+	0.592	+
IERVSDDEFNNY	7483739	-1.34	+	-3.442	-
SLVKSF	7418894	0.88	-	0.251	+
EIPKM	7.3878e+06	-0.52	+	-0.335	-
VPTVAM	7.3878e+06	1.63	-	-0.477	-
EGGIIE	7330507	0.2	-	-2.329	-
EVGEIF	7326498	0.68	-	-2.331	-
RAGF	7.30638e+06	-0.08	+	0.557	+
SPPAII	7301843	1.13	-	-0.747	-
SPIALP	7301843	1.02	-	-0.747	-
WPRRLP	7298012	-1.55	+	1.557	+
MRALPS	7.28203e+06	0.1	-	0.285	+
ESESSE	7269164	-2.15	+	-3.328	-
MTGSL	7.24598e+06	0.76	-	-0.715	-
MDFLNF	7.20533e+06	0.72	-	-1.715	-
FEYVSF	7.19493e+06	0.7	-	-1.444	-
DNQSEQLEGK	7189772	-2.23	+	-2.442	-
MFHIY	7.18735e+06	0.94	-	-0.681	-
EIEKY	7.16695e+06	-1.54	+	-1.336	-
QTFNQT	7142455	-1.52	+	-0.443	-
EVAFI	7.10284e+06	1.96	-	-1.333	-
VGPDDEKSWLQ	7101889	-1.24	+	-2.477	-
DSVMVP	7.09654e+06	0.73	-	-1.442	-
KNSTQH	7.09215e+06	-2.6	+	0.592	+
IDIVF	7.08959e+06	2.5	-	-1.442	-
EVFINS	7.06592e+06	0.62	-	-1.333	-
IDAVPL	7019783	1.53	-	-1.442	-
GPVIEL	7019783	1.17	-	-1.441	-
EVFVSL	7.01746e+06	1.78	-	-1.333	-
QTLGRR	7017273	-1.63	+	1.557	+
YIPLPDESSRL	6960777	-0.5	+	-1.444	-
MAMAFP	6909361	1.43	-	-0.715	-
VEVDKN	6889646	-1	+	-1.478	-
PSPAIL	6.88637e+06	1.02	-	-0.099	-
ITSSPI	6881573	0.85	-	-0.443	-
MAAPAI	6.82181e+06	1.7	-	-0.715	-
EQQHTE	6820894	-2.98	+	-2.293	-
EDGKI	6732947	-1.36	+	-1.335	-
RSHKA	6.69848e+06	-2.12	+	1.592	+
DLPEGPAVKIGE	6.68294e+06	-0.34	+	-2.44	-
NILEASYDTKFE	6.66166e+06	-0.65	+	-2.443	-
VSITE	6628746	0.74	-	-1.474	-
KDTSAK	6.62331e+06	-1.83	+	0.553	+
FTMI	6.61224e+06	2.12	-	-0.443	-
FYPF	6.58364e+06	0.67	-	-0.445	-
KEEVT	6568784	-1.48	+	-1.443	-
MVSTP	6568631	0.6	-	-0.715	-
YPGTP	6568631	-1.12	+	-0.445	-
MDDMDM	6.53946e+06	-0.8	+	-3.714	-
ELAQEP	6531811	-1.08	+	-2.331	-
YVKTF	6500336	0.22	-	0.552	+
MGQVP	6499377	0.12	-	-0.715	-
FDMCN	6468623	0.04	-	-1.467	-
ARDTVDGWFNIE	6457757	-0.6	+	-2.388	-
FSNGN	6453309	-1.08	+	-0.443	-
FSMGP	6453309	0.38	-	-0.443	-
MDLPV	6440807	0.96	-	-1.715	-
EVTII	6.43118e+06	1.8	-	-1.333	-
MEEF	6.4119e+06	-0.57	+	-2.713	-
EVPNID	6369821	-0.57	+	-2.331	-
MDVPL	6.33011e+06	0.96	-	-1.715	-
QSGGP	6.31649e+06	-1.34	+	-0.443	-
KSTEPE	6.30821e+06	-2.33	+	-1.441	-
ISIEF	6.30674e+06	1.5	-	-1.441	-
EIITI	6305005	1.86	-	-1.333	-
RDTVDGWFNIE	6.27758e+06	-0.82	+	-2.438	-
DLLTVF	6.24952e+06	1.73	-	-1.442	-
QVEIF	6.22352e+06	0.9	-	-1.441	-
EMPTF	6.21953e+06	-0.22	+	-1.333	-
FDYEPF	6218782	-0.72	+	-2.443	-
EGADI	6.20213e+06	-0.22	+	-2.332	-
ESTAP	6.20213e+06	-0.96	+	-1.333	-
EVGPDDEKSWLQ	6.20157e+06	-1.42	+	-3.333	-
FIDSI	6.08409e+06	1.5	-	-1.442	-
KGAF	6.07028e+06	0.07	-	0.555	+
NGERVFDGEL	6.06571e+06	-0.85	+	-2.44	-
EVAVIE	6.06212e+06	1.28	-	-2.329	-
EGDFIV	6040799	0.68	-	-2.332	-
LGEEEEQRQQ	6.03738e+06	-2.56	+	-3.438	-
WDIDYQ	6033158	-1.37	+	-2.444	-
MAVPAE	6020267	0.77	-	-1.712	-
ISDIF	6003235	1.5	-	-1.442	-
MEVVTF	6003235	1.48	-	-1.714	-
VSVPPP	5.98358e+06	0.47	-	-0.477	-
IVTPTP	5971172	0.68	-	-0.443	-
TIPPI	5895420	1.02	-	-0.792	-
EISVI	5.8865e+06	1.78	-	-1.333	-
KAGSTF	5885647	-0.2	+	0.555	+
MITPE	5.88381e+06	0.12	-	-1.712	-

## Sheet: F2
Sequence	Abundance	Gravy	Hydrophobicity (+) Hydrophilicity (-)	Theoretical charge	Cationic (+) Anionic (-)
FDPAI	2.71811e+09	0.8	-	-1.442	-
EGAVV	1097954944	1.26	-	-1.333	-
FDVI	1.06241e+09	2	-	-1.442	-
EVIF	995226886	2	-	-1.333	-
IAVII	6.07315e+08	3.9	-	-0.443	-
MVLVE	546114368	2.12	-	-1.712	-
IVPQ	5.07199e+08	0.9	-	-0.443	-
VEMALL	478314368	2	-	-1.476	-
NDGAKN	465100608	-2.17	+	-0.445	-
MASAAI	446112416	1.83	-	-0.715	-
AGTGH	405428288	-0.58	+	-0.356	-
MFDIF	361017248	1.7	-	-1.715	-
FVDPF	350117312	0.94	-	-1.442	-
MVTVE	3.4656e+08	1.22	-	-1.712	-
KPTP	338177920	-1.95	+	0.555	+
EVFF	3.34902e+08	1.57	-	-1.333	-
VNFDPF	315262688	0.2	-	-1.476	-
QVEII	311192672	1.24	-	-1.441	-
VAGELI	311192672	1.73	-	-1.476	-
FDFIS	309209440	1.16	-	-1.442	-
GFAPEF	304429536	0.32	-	-1.441	-
QIVT	304328800	1.12	-	-0.443	-
MDFF	2.98266e+08	1	-	-1.715	-
IDGE	289375712	-0.72	+	-2.439	-
TPSE	289375712	-1.65	+	-1.788	-
EIFI	2.69939e+08	2.08	-	-1.333	-
EIIF	266455438	2.08	-	-1.333	-
GGGCGG	264766768	0.08	-	-0.467	-
EAPIN	260648576	-0.46	+	-1.333	-
VVGGDP	260648576	0.42	-	-1.476	-
MESVL	254042048	1.12	-	-1.714	-
EITPEKNPQLR	2.53157e+08	-1.64	+	-0.334	-
DVFRAIPSE	2.44273e+08	-0.07	+	-1.439	-
HDATF	230849296	-0.56	+	-1.405	-
EAPF	215832640	-0.12	+	-1.333	-
MAGPR	2.14557e+08	-0.56	+	0.285	+
ISAAP	213256960	1.14	-	-0.443	-
EVAAG	211953184	0.78	-	-1.333	-
EAVGA	211953184	0.78	-	-1.333	-
NPVLCG	207707664	0.83	-	-0.467	-
FNIE	2.0683e+08	0.07	-	-1.439	-
FGGEI	204388640	0.6	-	-1.441	-
GGFIE	204388640	0.6	-	-1.439	-
NNQLDQNPRVF	2.03136e+08	-1.48	+	-0.442	-
EWVIF	197918816	1.42	-	-1.333	-
HNRFLE	197676592	-1.35	+	-0.403	-
FDVDI	1.88999e+08	0.9	-	-2.442	-
MGPAGF	186813328	0.68	-	-0.715	-
HNQDIFHDL	183430656	-1.03	+	-2.368	-
KSSSI	1.82242e+08	-0.36	+	0.555	+
MMGMF	1.79584e+08	1.62	-	-0.715	-
YVPY	179290408	0	-	-0.448	-
VAGGTQ	177349824	0.17	-	-0.477	-
ESSY	175998624	-1.6	+	-1.335	-
MDTSY	175998624	-0.88	+	-1.717	-
CQLAG	170704448	0.84	-	-0.467	-
AGCIAG	170704448	1.63	-	-0.417	-
SVIVE	1.68823e+08	1.72	-	-1.744	-
TVVVE	168784256	1.68	-	-1.788	-
MKRP	1.67139e+08	-2.02	+	1.282	+
MKPR	166057302	-2.02	+	1.282	+
VAITIP	164402152	2.12	-	-0.477	-
MAYGG	163897220	0.32	-	-0.718	-
IVGKF	1.62524e+08	1.44	-	0.555	+
ETSI	1.5712e+08	-0.12	+	-1.333	-
MKDM	1.56727e+08	-0.9	+	-0.717	-
MTFGS	155639264	0.56	-	-0.715	-
ESTI	1.55583e+08	-0.12	+	-1.333	-
MTDTI	155178496	0.3	-	-1.715	-
MKGMN	155178496	-0.8	+	0.282	+
FGGE	154832704	-0.38	+	-1.439	-
ISVIVP	150808576	2.5	-	-0.443	-
ESVI	1.4863e+08	1.1	-	-1.333	-
MLTMI	143123539	2.28	-	-0.715	-
EYVGQ	137426128	-0.9	+	-1.335	-
EYVGAG	137426128	0.07	-	-1.335	-
MTVFL	137420624	2.4	-	-0.715	-
EYVSF	137206160	0.28	-	-1.335	-
ISIY	1.3704e+08	1.72	-	-0.445	-
AGINI	136371568	1.38	-	-0.392	-
ISYI	1.35273e+08	1.73	-	-0.445	-
EGGIQ	132675696	-0.66	+	-1.333	-
AGGGLE	132675696	0.15	-	-1.389	-
MFLSF	1.30932e+08	2.1	-	-0.715	-
NNQLDQTPRVF	1.30476e+08	-1.23	+	-0.442	-
EFWVL	129468128	1.28	-	-1.333	-
PGYLPF	129468128	0.28	-	-0.101	-
MLVPH	128841984	1.02	-	-0.678	-
MEILF	128762836	1.9	-	-1.714	-
TGAGAG	128063856	0.28	-	-0.792	-
GHAPISLPNQL	1.25659e+08	-0.06	+	-0.406	-
CDGNN	123437928	-1.68	+	-1.467	-
GPTMI	1.23146e+08	0.74	-	-0.443	-
WGDPES	122394080	-1.78	+	-2.441	-
MFML	1.22303e+08	2.6	-	-0.715	-
MFLM	121748472	2.6	-	-0.715	-
ENGAI	120402672	-0.22	+	-1.333	-
EGGGAI	120402672	0.27	-	-1.333	-
NALEPDHRVE	118922171	-1.35	+	-2.401	-
GTTY	118035344	-0.78	+	-0.445	-
MTGTY	118035344	-0.24	+	-0.718	-
YIGA	117280160	1.15	-	-0.445	-
FTVG	117280160	1.47	-	-0.443	-
WEVIY	117064440	0.6	-	-1.444	-
AIPVNKPGRFE	116162700	-0.52	+	0.608	+
VDVPVKVPYS	115797600	0.41	-	-0.481	-
MEVGL	1.10539e+08	1.2	-	-1.714	-
MEVTS	1.10236e+08	0.22	-	-1.714	-
MAVVE	109912949	1.72	-	-1.712	-
PGVPAD	109793160	-0.18	+	-1.097	-
VPGPAD	109793160	-0.18	+	-1.475	-
IEFI	1.0836e+08	2.08	-	-1.441	-
KYYDDN	108155000	-2.83	+	-1.449	-
IVVEI	107908304	2.78	-	-1.441	-
FAII	107424528	3.4	-	-0.443	-
VSIDYQ	106250152	-0.07	+	-1.479	-
YVYP	105611328	0	-	-0.448	-
MTVGHQ	105611328	-0.28	+	-0.678	-
VTVE	1.03177e+08	1.05	-	-1.474	-
QPGQ	1.0293e+08	-2.25	+	-0.443	-
WKTYML	102848160	-0.18	+	0.552	+
LAVTPI	1.0167e+08	2	-	-0.443	-
QVIF	100992360	2	-	-0.443	-
AVIGG	100911120	1.94	-	-0.392	-
MIGNL	100911120	1.26	-	-0.715	-
IIGGG	100911120	1.56	-	-0.443	-
MEEE	1.00858e+08	-2.15	+	-3.71	-
EVNFW	99453424	-0.18	+	-1.333	-
MTVVE	99254384	1.22	-	-1.712	-
ISIN	98831448	1.17	-	-0.443	-
KDISEGPPAIKL	96751076	-0.38	+	-0.446	-
GGSGY	96446480	-0.66	+	-0.445	-
FEFPF	9.58253e+07	0.66	-	-1.441	-
WIDII	94711544	1.82	-	-1.442	-
KPGRR	94576535	-2.98	+	2.555	+
EINL	94569472	0.32	-	-1.333	-
VAGEI	94569472	1.32	-	-1.476	-
MIGGEL	94569472	0.98	-	-1.714	-
FEAPF	94216184	0.46	-	-1.441	-
QTYAQ	94216184	-1.44	+	-0.445	-
FSASAQ	94216184	0.22	-	-0.443	-
FATTGN	94216184	-0.12	+	-0.443	-
EVIPF	9.38397e+07	1.28	-	-1.333	-
QAAGKG	91256344	-0.77	+	0.555	+
IAVTLP	9.09168e+07	2	-	-0.443	-
GAYP	89090176	-0.38	+	-0.445	-
MFSGP	89090176	0.38	-	-0.715	-
RFREGDLIAVPT	8.88003e+07	-0.13	+	-0.441	-
SVISPK	88233944	0.27	-	0.251	+
PPGVPY	8.66972e+07	-0.38	+	-0.101	-
MAVGL	85101376	2.26	-	-0.715	-
GSGGY	84519028	-0.66	+	-0.445	-
MSIIF	8.43061e+07	2.58	-	-0.715	-
MGIIF	84126116	2.66	-	-0.715	-
KPTT	83247056	-1.73	+	0.555	+
SIAIIP	83002240	2.15	-	-0.747	-
WGGPGG	82902712	-0.68	+	-0.443	-
YEIVF	82656080	1.34	-	-1.444	-
MKGEL	8.15978e+07	-0.42	+	-0.716	-
GIITLP	81399912	1.68	-	-0.443	-
PGVPIM	79825147	1.17	-	-0.099	-
QEIP	79724496	-1.02	+	-1.441	-
EPIQ	79724496	-1.02	+	-1.333	-
TDDDYPYRAK	79150338	-2.2	+	-1.798	-
VSIY	78986824	1.65	-	-0.479	-
VSYI	78986824	1.65	-	-0.479	-
MVSYI	78986824	1.7	-	-0.718	-
MVTVQ	77625856	1.22	-	-0.715	-
ISGAV	77625856	1.86	-	-0.443	-
TQFA	76096832	0.1	-	-0.792	-
KGTIPF	74988544	0.12	-	0.555	+
MSEAY	74813880	-0.38	+	-1.716	-
MKSSS	7.46932e+07	-0.88	+	0.282	+
VSRT	74646296	-0.45	+	0.523	+
IAGVGA	74047208	1.92	-	-0.443	-
LPVPAF	72634280	1.57	-	-0.443	-
FLAPVP	72634280	1.57	-	-0.443	-
PLVPAF	72634280	1.57	-	-0.099	-
KDTPV	71538752	-1.1	+	-0.445	-
PVLPQ	71523880	0.26	-	-0.099	-
LPVPGA	71523880	1.03	-	-0.443	-
MFTIL	71344014	2.46	-	-0.715	-
KPVFIH	69990336	0.47	-	0.592	+
MVSEL	68713045	1.12	-	-1.714	-
KAAAA	68228160	0.66	-	0.555	+
SVDLN	66789180	0.04	-	-1.746	-
WDPY	66500848	-1.82	+	-1.445	-
FGPME	66500848	-0.16	+	-1.439	-
EVFNF	6.5531e+07	0.56	-	-1.333	-
YNLN	63608404	-1.12	+	-0.445	-
YQNV	63608404	-1.03	+	-0.445	-
FGMAP	63252520	0.9	-	-0.443	-
FPGCPSTF	63138016	0.37	-	-0.467	-
MLDLF	6.30848e+07	1.76	-	-1.715	-
FIEVV	63060256	2.44	-	-1.441	-
MLVVEF	63060256	2.23	-	-1.714	-
GEGFGA	63024656	-0.02	+	-1.441	-
ISSEDKPFN	62874420	-1.14	+	-1.443	-
MIIY	62313178	2.4	-	-0.718	-
EIVF	6.21875e+07	2	-	-1.333	-
KSFE	61637952	-1.35	+	-0.442	-
RPSYTNGPQE	60658724	-2.14	+	-0.442	-
IAVE	60460868	1.75	-	-1.439	-
DPSYY	59553776	-1.7	+	-1.447	-
EGYEF	59553776	-1.18	+	-2.334	-
MSSVSK	59303820	-0.03	+	0.282	+
NSFSM	59035232	-0.08	+	-0.443	-
SGGMYS	59035232	-0.3	+	-0.749	-
IVKGF	58834216	1.44	-	0.555	+
FVGKI	58834216	1.44	-	0.555	+
KVVAF	58834216	1.82	-	0.555	+
VIIII	5.86058e+07	4.44	-	-0.477	-
EPSPAG	58372848	-1.02	+	-1.333	-
VAIE	58314976	1.75	-	-1.474	-
VIAE	58314976	1.75	-	-1.474	-
MKIE	58314976	-0.25	+	-0.714	-
MSAVAL	5.79481e+07	2.12	-	-0.715	-
MYDF	5.79178e+07	-0.03	+	-1.717	-
FPHAH	57547792	-0.68	+	-0.369	-
ITPQ	57134464	-0.33	+	-0.443	-
MLPQT	57134464	-0.02	+	-0.715	-
MLPTGA	57134464	0.8	-	-0.715	-
GGIKLPTDIISK	5.61514e+07	0.18	-	0.553	+
MAAGI	55114400	1.92	-	-0.715	-
GTPLE	55035248	-0.48	+	-1.439	-
MDRNG	55029076	-2	+	-0.715	-
NQLDQTPRVF	5.44545e+07	-1	+	-0.442	-
MDYF	54063323	-0.03	+	-1.717	-
NALKPDNRIE	53967905	-1.39	+	-0.441	-
EVVIF	5.39598e+07	2.44	-	-1.333	-
VIGII	5.36996e+07	3.46	-	-0.477	-
FGIAM	53262224	2.12	-	-0.443	-
NSGY	5.31689e+07	-1.5	+	-0.445	-
AISI	53157899	2.5	-	-0.392	-
EVGVIL	5.29308e+07	2.13	-	-1.333	-
FNNQLDQNPRVF	5.28532e+07	-1.12	+	-0.442	-
MGWR	5.28479e+07	-0.97	+	0.285	+
MGSNY	5.26792e+07	-0.82	+	-0.718	-
MPQF	52619176	-0.1	+	-0.715	-
MAHSSH	52619176	-0.72	+	-0.642	-
GASITT	52472188	0.62	-	-0.443	-
MEVY	51987403	0.33	-	-1.716	-
KAIE	51624064	-0.27	+	-0.442	-
FEII	5.05287e+07	2.08	-	-1.441	-
VIGVE	50394640	1.8	-	-1.474	-
SITVP	50394640	1.12	-	-0.747	-
GSGGII	50216544	1.17	-	-0.443	-
ATGVI	50170160	1.88	-	-0.392	-
SAVIA	50170160	2.3	-	-0.747	-
MFLEI	4.99149e+07	1.9	-	-1.714	-
ESSFN	49867308	-1.16	+	-1.333	-
MSSSNF	49867308	-0.2	+	-0.715	-
ETFMQ	49704136	-0.6	+	-1.333	-
IIEG	49545936	1.27	-	-1.441	-
FPSASF	49025016	0.7	-	-0.443	-
TGAFPY	49025016	0.1	-	-0.794	-
FGVDAF	49025016	1.28	-	-1.442	-
MSIEQ	48401828	-0.28	+	-1.714	-
MESIQ	48401828	-0.28	+	-1.714	-
IPAIAI	48286032	2.58	-	-0.443	-
EVIIF	4.81196e+07	2.5	-	-1.333	-
MFQY	4.79748e+07	-0.03	+	-0.718	-
MYTE	4.70826e+07	-0.9	+	-1.714	-
MFEVL	47057544	1.84	-	-1.714	-
MKSPE	47015732	-1.58	+	-0.714	-
VIPQ	4.68066e+07	0.9	-	-0.477	-
SGGGSF	46610764	0	-	-0.747	-
EHDPDFKNPIGW	46212364	-1.52	+	-2.298	-
SAGANP	45895868	-0.45	+	-0.747	-
MMAF	45541083	2.1	-	-0.715	-
MIPTY	45511692	0.56	-	-0.718	-
NDNPF	45382300	-1.86	+	-1.442	-
IIGVDI	45151896	2.3	-	-1.442	-
EIWDAIKTW	44886248	-0.29	+	-1.335	-
MSSVTF	44639520	1.1	-	-0.715	-
EGII	4.45668e+07	1.27	-	-1.333	-
MEILI	4.45182e+07	2.24	-	-1.714	-
YAEPF	44100860	-0.36	+	-1.444	-
APKRH	44038572	-2.28	+	1.642	+
SVISP	4.38912e+07	1.1	-	-0.747	-
VSISP	4.36508e+07	1.1	-	-0.477	-
AAPAP	43560304	0.44	-	-0.392	-
IVPAAG	43371500	1.72	-	-0.443	-
VIGAAP	43371500	1.72	-	-0.477	-
HDPDFKNPIGW	4.31162e+07	-1.35	+	-1.408	-
FDAIF	43088076	1.68	-	-1.442	-
MWGR	4.28877e+07	-0.98	+	0.285	+
FDIVI	42640018	2.5	-	-1.442	-
MSIF	4.25973e+07	2.1	-	-0.715	-
IGIPI	41758044	2.3	-	-0.443	-
DFFPAL	41664780	1.02	-	-1.442	-
MFGSI	41555632	1.6	-	-0.715	-
PAVGI	4.12802e+07	1.7	-	-0.099	-
EGVV	41240856	1.12	-	-1.333	-
MDGVL	41240856	1.2	-	-1.715	-
EIVLI	4.06454e+07	2.7	-	-1.333	-
VINDRFGIVE	4.06276e+07	0.48	-	-1.473	-
QVIII	4.05966e+07	2.84	-	-0.443	-
MEVAI	40559729	1.78	-	-1.714	-
RDYFPI	40265840	-0.6	+	-0.445	-
YRDFPI	40265840	-0.6	+	-0.445	-
GNAVFDGELR	40147484	-0.32	+	-1.441	-
MGLGW	39895292	0.8	-	-0.715	-
PGSDVP	39773760	-0.62	+	-1.098	-
MSTSF	39610896	0.48	-	-0.715	-
FPSF	39293200	0.8	-	-0.443	-
TPGPF	39078984	-0.3	+	-0.792	-
PIIVPI	3.90288e+07	2.42	-	-0.099	-
SGGGGF	3.89134e+07	0.07	-	-0.747	-
MEGFFP	3.88751e+07	0.33	-	-1.714	-
MAYF	38859044	1.3	-	-0.718	-
MSGP	38849796	-0.23	+	-0.715	-
DCLNYE	38849796	-0.92	+	-2.466	-
MKYM	38668560	-0.35	+	0.28	+
MYAGF	38668560	0.96	-	-0.718	-
KDPPF	38648960	-1.56	+	-0.445	-
MTPI	38496892	1.02	-	-0.715	-
PGVGSS	38496892	0.03	-	-0.099	-
DAAGGL	38496892	0.52	-	-1.442	-
EGFFP	38496832	0.02	-	-1.333	-
KARPY	38293388	-1.9	+	1.552	+
VLPPQE	38284360	-0.37	+	-1.474	-
MSGGF	3.8155e+07	0.62	-	-0.715	-
FEIF	38116526	1.65	-	-1.441	-
KGVE	37891488	-0.9	+	-0.442	-
FGIVP	3.74621e+07	1.9	-	-0.443	-
VKNNNPFSF	36995728	-0.78	+	0.521	+
EITPEKNPQLRD	3.69818e+07	-1.79	+	-1.332	-
YTIMT	36753744	0.74	-	-0.445	-
FGGILE	36736468	1.13	-	-1.439	-
KDVPE	36731148	-1.66	+	-1.441	-
ILAIAP	36611744	2.47	-	-0.443	-
FEEINKVLF	36605040	0.41	-	-1.443	-
IGITI	3.64234e+07	2.48	-	-0.443	-
MKNPF	36397320	-0.86	+	0.282	+
MRTTQ	36397320	-1.5	+	0.285	+
DVFRAIPSEVL	3.63096e+07	0.67	-	-1.441	-
IPDTPN	36308416	-1.07	+	-1.442	-
EIGLL	3.62503e+07	1.64	-	-1.333	-
FSRTI	36170492	0.26	-	0.557	+
QDPVP	36139408	-1.2	+	-1.442	-
FIEF	36097393	1.65	-	-1.441	-
MSPF	35964456	0.57	-	-0.715	-
VISP	35831420	1.57	-	-0.477	-
EAGVVPPGAR	35780664	0	-	-0.333	-
FDVYI	35779016	1.34	-	-1.445	-
FPAIY	35709060	1.24	-	-0.445	-
EGIAPF	35435084	0.6	-	-1.333	-
KDEIM	35434216	-0.9	+	-1.443	-
FPMPT	35065076	0.16	-	-0.443	-
PTMPF	35065076	0.16	-	-0.099	-
ISIGGI	34898947	1.98	-	-0.443	-
EIFF	3.48047e+07	1.65	-	-1.333	-
PVPGGE	34453760	-0.55	+	-1.095	-
VTGVNE	34388108	0.05	-	-1.474	-
FISDF	34366836	1.16	-	-1.442	-
QPSLVQ	34355896	-0.23	+	-0.443	-
FNNQLDQTPRVF	3.4207e+07	-0.89	+	-0.442	-
LAVIIQ	34155580	2.55	-	-0.443	-
EVGIVI	3.38608e+07	2.25	-	-1.333	-
MQSISL	33781912	0.85	-	-0.715	-
MTVTLN	33781912	0.83	-	-0.715	-
FIQI	33759808	2.08	-	-0.443	-
GAGVI	3.37202e+07	1.94	-	-0.443	-
RAIMP	33664804	0.42	-	0.557	+
MSQLLDKAKNF	33664804	-0.45	+	0.28	+
KTDFYE	33649708	-1.68	+	-1.444	-
MEPLRL	33633292	-0.02	+	-0.714	-
FAVVP	33138324	2.28	-	-0.443	-
MVGALV	32763464	2.58	-	-0.715	-
GVAGI	32462188	1.94	-	-0.443	-
SVIVYE	32441858	1.22	-	-1.746	-
VDIPGI	32266540	1.28	-	-1.476	-
IPLIPT	32195580	1.48	-	-0.443	-
IPIITP	32195580	1.6	-	-0.443	-
MAGIK	32174878	0.78	-	0.282	+
WELPDDAGKY	3.18566e+07	-1.3	+	-2.446	-
MITIM	3.18026e+07	2.42	-	-0.715	-
MIIR	3.15947e+07	1.6	-	0.285	+
ILAIVP	31560580	2.87	-	-0.443	-
FLKMYN	31515774	-0.03	+	0.552	+
VPVEM	31509354	1.04	-	-1.476	-
MIRI	3.14858e+07	1.6	-	0.285	+
GHRNPEEIPWG	31121516	-1.69	+	-1.404	-
TIAT	3.1013e+07	1.22	-	-0.792	-
GMPLF	3.08351e+07	1.3	-	-0.443	-
ISSI	30706327	1.85	-	-0.443	-
MIISF	30647784	2.58	-	-0.715	-
FDYI	30470304	0.62	-	-1.445	-
EVNFF	3.03577e+07	0.56	-	-1.333	-
TPEKNPQLRDL	3.02388e+07	-1.7	+	-0.793	-
FPGPN	30094024	-0.86	+	-0.443	-
MDDDD	30092225	-2.42	+	-4.712	-
MRAH	2.99482e+07	-1	+	0.321	+
IGDFY	29914546	0.42	-	-1.445	-
KFNECQLNNL	29813360	-0.85	+	-0.468	-
FVIVE	29787820	2.44	-	-1.439	-
YTIPI	29787820	1.08	-	-0.445	-
ISVEVI	29675470	2.18	-	-1.441	-
HFREGDLIAVPT	2.96018e+07	-0.03	+	-1.404	-
TVVDII	29578606	2.2	-	-1.791	-
MVLSI	2.95755e+07	2.72	-	-0.715	-
DRFGA	29573294	-0.76	+	-0.442	-
IIGII	2.95586e+07	3.52	-	-0.443	-
IVGAP	29324952	1.7	-	-0.443	-
GIFI	29324178	2.85	-	-0.443	-
MAITV	29257060	2.34	-	-0.715	-
FPIMG	29232338	1.44	-	-0.443	-
KGGGDF	29232338	-0.97	+	-0.445	-
MEFK	29217661	-0.68	+	-0.716	-
MFDIL	2.92024e+07	1.9	-	-1.715	-
KAYE	29013092	-1.72	+	-0.444	-
ESKF	29013092	-1.35	+	-0.335	-
SWDPPNPHIGIN	28864410	-0.97	+	-1.71	-
TGGGGP	28671466	-0.65	+	-0.792	-
FTPSI	28541848	0.84	-	-0.443	-
ISII	28505737	3.17	-	-0.443	-
EVVVP	28353100	1.5	-	-1.333	-
MGKPT	28347098	-0.94	+	0.282	+
SMKE	28312934	-1.57	+	-0.746	-
MSVFW	28108918	1.44	-	-0.715	-
EINGPI	27934446	0	-	-1.333	-
KSMDPQ	27572850	-1.9	+	-0.445	-
FSFREQPQQNE	27572850	-2.03	+	-1.438	-
FGGFLE	27271564	0.85	-	-1.439	-
GVNPEGKVPVVL	27252482	0.48	-	-0.444	-
MLGLIP	27250178	2	-	-0.715	-
GEQRLQESVIVE	27200460	-0.54	+	-2.437	-
MDVF	27198564	1.35	-	-1.715	-
MEVLLF	2.71072e+07	2.17	-	-1.714	-
MTMF	2.70481e+07	1.47	-	-0.715	-
INEGALLLPH	26895706	0.55	-	-1.405	-
TVTP	26825638	0.3	-	-0.792	-
MAGYG	26422496	0.32	-	-0.718	-
WTPY	26418473	-1.12	+	-0.445	-
TPDLAPIVHL	26310172	0.75	-	-1.755	-
KPATP	26137876	-1.2	+	0.555	+
VPLGQ	26137876	0.5	-	-0.477	-
PVLGQ	26137876	0.5	-	-0.099	-
MSLMSL	26012920	1.63	-	-0.715	-
APHVNPISDEY	25997244	-0.77	+	-2.357	-
IVSI	2.59908e+07	3.1	-	-0.443	-
PTAAML	25696402	1.17	-	-0.099	-
TTAI	25600378	1.23	-	-0.792	-
VDWIER	25598498	-0.62	+	-1.475	-
KMKAK	25568812	-1.6	+	2.55	+
NHLRFE	25353108	-1.35	+	-0.403	-
IVMLVQ	25295516	2.52	-	-0.443	-
VTVI	2.52562e+07	3.05	-	-0.477	-
ITISI	2.52015e+07	2.4	-	-0.443	-
MRIAH	2.50989e+07	0.1	-	0.321	+
MELFI	25094270	1.9	-	-1.714	-
MEFLL	25094270	1.76	-	-1.714	-
IGIT	25067762	1.97	-	-0.443	-
KATE	24889248	-1.57	+	-0.442	-
MTISS	24802914	0.82	-	-0.715	-
VSVE	24682871	1.03	-	-1.474	-
PVGPDG	23931896	-0.55	+	-1.098	-
ISIP	23930310	1.65	-	-0.443	-
EVAVF	23906434	1.9	-	-1.333	-
IAGII	2.39018e+07	2.98	-	-0.443	-
EVGIF	2.38753e+07	1.52	-	-1.333	-
MIVGL	2.38067e+07	2.8	-	-0.715	-
VAEY	23765904	0.3	-	-1.478	-
FVGI	2.37591e+07	2.77	-	-0.443	-
AGSIV	23755262	1.86	-	-0.392	-
MVSLGA	23755262	1.75	-	-0.715	-
NPTAGQ	23748594	-1.32	+	-0.443	-
FDGGIF	23704074	0.97	-	-1.442	-
MSSVN	23696952	0.2	-	-0.715	-
QPNAVN	23608468	-1.02	+	-0.443	-
AIVII	2.35933e+07	3.9	-	-0.392	-
MMPF	2.35595e+07	1.25	-	-0.715	-
GIKLPTDIISK	2.35176e+07	0.23	-	0.553	+
FDVF	23382379	1.57	-	-1.442	-
IVEII	2.33346e+07	2.84	-	-1.441	-
ENSY	23156768	-2.27	+	-1.335	-
ESYGG	23156768	-1.28	+	-1.335	-
LDIGAH	23039990	0.5	-	-1.405	-
EIVVL	2.28539e+07	2.64	-	-1.333	-
VPDGAP	22850874	-0.18	+	-1.476	-
EVGALI	2.28145e+07	1.73	-	-1.333	-
TVPAT	22791244	0.6	-	-0.792	-
EWGIP	22784588	-0.38	+	-1.333	-
QGIV	22524894	1.2	-	-0.443	-
ISVPVEGPYKPA	22491156	0	-	-0.446	-
VPGPY	2.24727e+07	-0.14	+	-0.479	-
RSQSDNFEYVSF	2.23733e+07	-1.03	+	-1.444	-
IAPLSL	22326999	1.92	-	-0.443	-
FGGGSP	22167298	-0.13	+	-0.443	-
EVGGF	22112695	0.54	-	-1.333	-
WGGS	21938656	-0.62	+	-0.443	-
MAGQ	21938656	-0.05	+	-0.715	-
ISVAF	21865766	2.5	-	-0.443	-
VSIDI	21854364	1.78	-	-1.476	-
ISVVE	21854364	1.72	-	-1.439	-
ESVVI	21854364	1.72	-	-1.333	-
MTDVVL	21854364	1.65	-	-1.715	-
KAYAP	21843278	-0.64	+	0.552	+
MRII	21833812	1.6	-	0.285	+
MLLEF	21728270	1.76	-	-1.714	-
FLAVTP	21631080	1.72	-	-0.443	-
TPTAM	21619028	0.14	-	-0.792	-
YVSK	21402490	-0.45	+	0.552	+
ISGVVT	21385732	1.83	-	-0.443	-
MGVIK	21335130	1.26	-	0.282	+
MFNNN	21281070	-1.16	+	-0.715	-
KSCGG	21281070	-0.6	+	0.53	+
MFGGNN	21281070	-0.52	+	-0.715	-
SPMPTP	21266086	-0.73	+	-0.747	-
EYGF	21258212	-0.6	+	-1.335	-
MEYGF	21258212	-0.1	+	-1.716	-
YIVGI	21215752	2.3	-	-0.445	-
VDAQPQ	21191162	-1.02	+	-1.476	-
KSSSVS	21147382	-0.48	+	0.555	+
DADPSY	21111544	-1.48	+	-2.444	-
EVIVI	2.08897e+07	2.78	-	-1.333	-
KSYGT	20757402	-1.42	+	0.552	+
FIDF	2.07455e+07	1.65	-	-1.442	-
VPMI	20723212	2.25	-	-0.477	-
MIVP	20723212	2.25	-	-0.715	-
KDVPA	20666644	-0.6	+	-0.445	-
IGGIII	2.05734e+07	2.87	-	-0.443	-
ISPTF	20525494	0.84	-	-0.443	-
VTTMI	20525494	1.84	-	-0.477	-
KSSDK	20525494	-2.58	+	0.553	+
KSSGSV	20525494	-0.42	+	0.555	+
KAASST	20525494	-0.43	+	0.555	+
MLFIP	20489642	2.28	-	-0.715	-
VIIQ	2.046e+07	2.42	-	-0.477	-
FDISF	2.04438e+07	1.16	-	-1.442	-
RNPEEIPWGST	20413754	-1.5	+	-1.44	-
EIAI	2.02304e+07	1.82	-	-1.333	-
IEAI	20181814	1.82	-	-1.441	-
MEIAL	20181814	1.7	-	-1.714	-
YGGDPT	20133086	-1.32	+	-1.445	-
LAGEKDNVVRQ	2.01003e+07	-0.8	+	-0.444	-
TIIPLP	2.00937e+07	1.48	-	-0.792	-
RDIDVF	20082668	0	-	-1.442	-
FEGPI	19983474	0.36	-	-1.441	-
EVFAP	19983474	0.74	-	-1.333	-
MAVPSF	19983474	1.38	-	-0.715	-
SVGGNI	1.99019e+07	0.6	-	-0.747	-
WTIVVQ	19803472	1.3	-	-0.443	-
WDPI	1.97849e+07	-0.38	+	-1.442	-
KSSCP	19737598	-0.92	+	0.53	+
QMVGQ	19737598	-0.26	+	-0.443	-
ILTGGP	19723146	0.87	-	-0.443	-
EVSFAP	19707690	0.48	-	-1.333	-
ITGGIL	1.96598e+07	1.88	-	-0.443	-
MYML	1.9579e+07	1.57	-	-0.718	-
FEFP	19540694	0.12	-	-1.441	-
PDPGGP	19540694	-1.52	+	-1.098	-
EFPLDF	19476572	0.13	-	-2.332	-
MSIY	1.94233e+07	1.07	-	-0.718	-
FVDW	19387328	0.65	-	-1.442	-
FVGMP	19387328	1.38	-	-0.443	-
KSMAN	19387328	-0.9	+	0.555	+
MGIPH	1.93733e+07	0.24	-	-0.678	-
MSLMME	19356200	0.87	-	-1.712	-
KAVE	19320000	-0.35	+	-0.442	-
SQKGEIKLPTL	1.93117e+07	-0.56	+	0.249	+
VAIAPI	19280060	2.53	-	-0.477	-
MFLSPF	1.92786e+07	1.48	-	-0.715	-
MFEF	1.92292e+07	1	-	-1.714	-
IPGFI	19215120	1.96	-	-0.443	-
VGRSI	19188774	0.6	-	0.523	+
GVRSI	19188774	0.6	-	0.557	+
MFFE	19145784	1	-	-1.712	-
KGGDAI	19142538	-0.32	+	-0.445	-
KGGDVH	19078798	-1.2	+	-0.408	-
QGVI	1.87864e+07	1.2	-	-0.443	-
MQHSA	18769194	-0.76	+	-0.678	-
QSISAA	18679356	0.5	-	-0.443	-
MGVSH	1.86724e+07	0.34	-	-0.678	-
MITII	1.86363e+07	2.94	-	-0.715	-
KGHTI	18615948	-0.74	+	0.592	+
AGVGGI	18503670	1.55	-	-0.392	-
KEFTER	18497888	-2.22	+	-0.443	-
EVAIE	18491162	0.7	-	-2.329	-
PSHAE	18470180	-1.46	+	-1.059	-
KSAHGD	18399998	-1.67	+	-0.407	-
ISAII	18380674	2.9	-	-0.443	-
GEQPRPFPFP	1.83001e+07	-1.27	+	-0.441	-
VEVF	18298192	1.93	-	-1.476	-
MYLTI	18290038	1.64	-	-0.718	-
KTPA	1.82785e+07	-1.1	+	0.555	+
IFIE	18258606	2.08	-	-1.439	-
MISSSK	18258606	0.02	-	0.282	+
IGGGI	18249464	1.56	-	-0.443	-
KNPQLRDLDVF	1.82354e+07	-0.85	+	-0.444	-
VTVII	1.81877e+07	3.34	-	-0.477	-
ASDALDKIRFE	1.81852e+07	-0.45	+	-1.391	-
MAILQ	18090338	1.7	-	-0.715	-
GIFLE	18084766	1.44	-	-1.439	-
AIVEF	18084766	1.96	-	-1.391	-
EVFAI	18084766	1.96	-	-1.333	-
EIAVF	18084766	1.96	-	-1.333	-
KSGSSI	18084766	-0.37	+	0.555	+
MVLST	18016982	1.68	-	-0.715	-

## Sheet: F3
Sequence	Abundance	Gravy	Hydrophobicity (+) Hydrophilicity (-)	Theoretical charge	Cationic (+) Anionic (-)
VIII	2.00183e+09	4.42	-	-0.477	-
LDQNPRVF	1821811471	-0.73	+	-0.442	-
MVILL	1.72284e+09	3.64	-	-0.715	-
MFPAI	1.23909e+09	1.88	-	-0.715	-
GGFF	1.18774e+09	1.2	-	-0.443	-
FGGF	1.16177e+09	1.2	-	-0.443	-
HPSS	1152195712	-1.6	+	-0.406	-
FSPF	1.08995e+09	0.8	-	-0.443	-
YAPF	1086050304	0.42	-	-0.445	-
MFSMI	1086050304	2.06	-	-0.715	-
MAYPF	1086050304	0.72	-	-0.718	-
ITPEKNPQLRDL	1064240896	-1.18	+	-0.444	-
KAGVG	1.02617e+09	0.26	-	0.555	+
MFIF	1.01049e+09	3	-	-0.715	-
FIVI	7.7022e+08	4	-	-0.443	-
AGPQAP	745457772	-0.58	+	-0.392	-
VIIF	7.27964e+08	4	-	-0.477	-
MVVFF	6.60142e+08	3.18	-	-0.715	-
VVFF	659846464	3.5	-	-0.477	-
MIHSI	659846464	1.38	-	-0.678	-
IVIF	6.36607e+08	4	-	-0.443	-
MLAIF	5.86994e+08	2.96	-	-0.715	-
IIGAF	581056584	2.64	-	-0.443	-
AGGRPL	557634496	-0.22	+	0.608	+
MITLF	5.54487e+08	2.46	-	-0.715	-
QIIF	548592448	2.08	-	-0.443	-
FIAPI	546522688	2.4	-	-0.443	-
MISLF	537425663	2.44	-	-0.715	-
IAIF	517985096	3.4	-	-0.443	-
IIIF	4.89935e+08	4.08	-	-0.443	-
QSVGK	487154656	-0.88	+	0.555	+
MAIIF	4.86545e+08	3.1	-	-0.715	-
MILQF	467448096	1.9	-	-0.715	-
IFAIG	467448096	2.64	-	-0.443	-
GIGTVPVGRVE	466607712	0.51	-	-0.439	-
MLAVVI	463568541	3.4	-	-0.715	-
AIVVI	4.61123e+08	3.84	-	-0.392	-
MISIL	453675808	2.78	-	-0.715	-
MLITV	453675808	2.74	-	-0.715	-
IGGIF	4.49828e+08	2.2	-	-0.443	-
FVIAP	4.49488e+08	2.34	-	-0.443	-
YVAPI	444457184	1.52	-	-0.445	-
SVIPF	444457184	1.82	-	-0.747	-
SVFPI	444457184	1.82	-	-0.747	-
MVILF	422232832	3.44	-	-0.715	-
FGSTI	416503328	1.08	-	-0.443	-
SPIVPL	416016032	1.42	-	-0.747	-
AIIF	409801664	3.4	-	-0.392	-
FPAIF	403288410	2.06	-	-0.443	-
VEGH	394626144	-0.72	+	-1.439	-
IVII	3.78978e+08	4.42	-	-0.443	-
TNDRPSIGNL	375885504	-1.02	+	-0.791	-
MLGVF	3.69791e+08	2.46	-	-0.715	-
LDQNPRVFY	3.68504e+08	-0.79	+	-0.445	-
GVIF	366436736	2.78	-	-0.443	-
MVGIF	366436736	2.6	-	-0.715	-
MITFL	364702112	2.46	-	-0.715	-
MFTF	3.62514e+08	1.7	-	-0.715	-
AENNQRNF	362200256	-2.17	+	-0.391	-
SIVF	360304792	2.67	-	-0.747	-
KADIF	351556800	0.34	-	-0.445	-
FIDAK	351556800	0.34	-	-0.445	-
IIII	3.46584e+08	4.5	-	-0.443	-
MLVFI	336384896	3.44	-	-0.715	-
MFVII	336384896	3.58	-	-0.715	-
ITII	3.35126e+08	3.2	-	-0.443	-
FITI	329377568	2.77	-	-0.443	-
RRQFPI	328636768	-1.13	+	1.557	+
RRIQFP	328636768	-1.13	+	1.557	+
KAEAK	325574720	-1.54	+	0.554	+
FVII	311712384	4	-	-0.443	-
PVGGP	301165056	0.04	-	-0.099	-
IIFI	299748768	4.08	-	-0.443	-
VAAII	294098352	3.36	-	-0.477	-
MKVAL	293941152	1.56	-	0.282	+
QTVII	293051424	1.8	-	-0.443	-
IGGTLI	293051424	1.88	-	-0.443	-
MKDVVL	293051424	1.12	-	-0.717	-
VTIF	2.92989e+08	2.7	-	-0.477	-
FGII	2.81753e+08	2.85	-	-0.443	-
MFGFP	281121344	1.1	-	-0.715	-
LDQTPRVFY	280789536	-0.48	+	-0.445	-
MFSVL	2.74195e+08	2.38	-	-0.715	-
VTIYI	268006608	2.24	-	-0.479	-
VSIF	267731664	2.67	-	-0.477	-
SVFI	267731664	2.67	-	-0.747	-
SIIIY	265996512	2.28	-	-0.749	-
MILGF	2.64037e+08	2.52	-	-0.715	-
GIGIQL	263971904	1.42	-	-0.443	-
VVIVP	263223728	3.1	-	-0.477	-
VVIPV	263223728	3.1	-	-0.477	-
KSSAK	261843136	-1.52	+	1.552	+
IIAGF	261843136	2.64	-	-0.443	-
VIFI	260457616	4	-	-0.477	-
FISI	258709200	2.75	-	-0.443	-
MKTIH	2.45161e+08	-0.28	+	0.319	+
TIIF	2.44933e+08	2.78	-	-0.792	-
MFGII	241585648	2.66	-	-0.715	-
MITVF	238582760	2.54	-	-0.715	-
MFISL	2.37944e+08	2.44	-	-0.715	-
IIVI	235246160	4.42	-	-0.443	-
KEHAVF	234398928	-0.3	+	-0.407	-
VAFPF	233593952	2	-	-0.477	-
MFLGL	231495554	2.38	-	-0.715	-
KGDPP	228953264	-2.2	+	-0.445	-
MYVSF	2.28631e+08	1.36	-	-0.718	-
YVSF	2.26144e+08	1.23	-	-0.445	-
IISYI	225215376	2.28	-	-0.445	-
IGFI	223940032	2.85	-	-0.443	-
FSIF	222497032	2.33	-	-0.443	-
IVFAP	221437472	2.34	-	-0.443	-
GVAIF	218830038	2.58	-	-0.443	-
PIIIP	218793712	2.06	-	-0.099	-
ISPIPVLKE	216717168	0.62	-	-0.442	-
MITLAP	2.16329e+08	1.62	-	-0.715	-
IISF	2.14655e+08	2.75	-	-0.443	-
IAFI	2.13577e+08	3.4	-	-0.443	-
AIGII	2.13366e+08	2.98	-	-0.392	-
IIAGI	206344352	2.98	-	-0.443	-
VAIAI	206344352	3.36	-	-0.477	-
EAGVVPPARF	205091946	0.32	-	-0.333	-
EVISGN	204962208	0.08	-	-1.333	-
TPGTP	202335152	-1	+	-0.792	-
VAIF	201325296	3.33	-	-0.477	-
ITAIP	200188128	1.7	-	-0.443	-
FSVTF	1.94724e+08	1.66	-	-0.443	-
FGSII	1.93966e+08	2.12	-	-0.443	-
GVAII	192324936	2.92	-	-0.443	-
KPTPI	190572640	-0.66	+	0.555	+
VGGLLP	190572640	1.57	-	-0.477	-
GVGIPL	190572640	1.68	-	-0.443	-
LVGGIP	190572640	1.68	-	-0.443	-
MTLFV	185676472	2.4	-	-0.715	-
TIIIP	185239716	2.24	-	-0.792	-
VFIAP	183861472	2.34	-	-0.477	-
IIGF	180678360	2.85	-	-0.443	-
MGLPF	179580248	1.3	-	-0.715	-
KSKSAP	177576280	-1.53	+	1.552	+
SIGIF	174262816	2.12	-	-0.747	-
KRRGP	1.72228e+08	-2.98	+	2.555	+
IIAVPT	171388445	2.12	-	-0.443	-
GIIF	1.70979e+08	2.85	-	-0.443	-
IIPI	170945632	2.98	-	-0.443	-
IIYI	1.70623e+08	3.05	-	-0.445	-
ILAVTP	169009360	2	-	-0.443	-
IITAVP	169009360	2.12	-	-0.443	-
KVPY	164738448	-0.65	+	0.552	+
IGGFI	164738448	2.2	-	-0.443	-
YVVV	162682240	2.83	-	-0.445	-
MVYVV	162682240	2.64	-	-0.718	-
MLIVF	161775216	3.44	-	-0.715	-
IVAIP	161349316	2.68	-	-0.443	-
PGPVSG	1.59829e+08	-0.1	+	-0.099	-
ITFI	159136840	2.77	-	-0.443	-
MTLIF	157680263	2.46	-	-0.715	-
QIVTF	156975760	1.46	-	-0.443	-
ITIF	1.5603e+08	2.78	-	-0.443	-
MIIFI	155227072	3.64	-	-0.715	-
KVMI	1.55135e+08	1.68	-	0.555	+
MIVIL	152164528	3.78	-	-0.715	-
GIPF	149268757	1.32	-	-0.443	-
MLPVLL	147328192	2.65	-	-0.715	-
KNDIK	143020272	-2.06	+	0.553	+
MFSIL	141147365	2.44	-	-0.715	-
SGDVWFPQPAPK	140355904	-0.75	+	-0.749	-
KDVFRAIPSE	1.37621e+08	-0.45	+	-0.441	-
VTFI	135466288	2.7	-	-0.477	-
MYIF	1.34727e+08	1.97	-	-0.718	-
KAGGV	134149752	0.26	-	0.555	+
VGAGK	134149752	0.26	-	0.521	+
GNAVFDGELRRG	1.31616e+08	-0.67	+	-0.441	-
MIGIF	129691968	2.66	-	-0.715	-
KYRKRF	129691968	-2.55	+	3.55	+
MDWH	129347768	-1.43	+	-1.678	-
MYMQ	129347768	-0.25	+	-0.718	-
MKHH	1.28872e+08	-2.1	+	0.356	+
NEGSIF	127693008	-0.15	+	-1.441	-
VPAAAP	126791552	1.07	-	-0.477	-
IAIPI	125597794	2.74	-	-0.443	-
MIMIL	125400536	3.32	-	-0.715	-
FTIV	124656328	2.7	-	-0.443	-
IIGGI	1.24503e+08	2.54	-	-0.443	-
MFLLL	123981818	3.22	-	-0.715	-
TGGLSQ	123804936	-0.33	+	-0.792	-
TLAGSN	123804936	0.03	-	-0.792	-
MAIFL	123287632	2.96	-	-0.715	-
MRRK	122607488	-2.75	+	2.282	+
IIIPN	120467768	1.68	-	-0.443	-
MLILPN	120467768	1.48	-	-0.715	-
TIIIF	1.20465e+08	3.12	-	-0.792	-
IPVNKPGRYDDF	119048536	-1.03	+	-0.447	-
YVVII	1.18727e+08	3.22	-	-0.445	-
MISPF	1.17327e+08	1.36	-	-0.715	-
FAVTP	115478862	1.3	-	-0.443	-
KIPY	115209080	-0.57	+	0.552	+
MKLML	115209080	1.5	-	0.282	+
IAGIF	115209080	2.64	-	-0.443	-
MLGGLL	1.15053e+08	2.08	-	-0.715	-
MVIGIF	1.14981e+08	2.92	-	-0.715	-
ITIPAI	114438840	2.17	-	-0.443	-
IIAI	114046082	3.83	-	-0.443	-
VVLPVQ	113851168	1.88	-	-0.477	-
FGAII	113608488	2.64	-	-0.443	-
MKPLY	113608488	-0.22	+	0.28	+
IPGII	113341076	2.3	-	-0.443	-
FIVPI	111594541	2.88	-	-0.443	-
AVVYP	110514328	1.46	-	-0.395	-
IIIY	1.09335e+08	3.05	-	-0.445	-
VAIAF	108871144	3.02	-	-0.477	-
FAGLLN	108514400	1.38	-	-0.443	-
IITF	1.0735e+08	2.78	-	-0.443	-
GGNDTFPYPR	1.06509e+08	-1.47	+	-0.445	-
FIGGF	105701780	1.86	-	-0.443	-
AIVPTI	105200151	2.12	-	-0.392	-
MFAII	104629008	3.1	-	-0.715	-
IVGIF	1.04606e+08	3.12	-	-0.443	-
MLLGL	1.04538e+08	2.58	-	-0.715	-
MVAIL	104408672	3.24	-	-0.715	-
MFINL	103088907	1.9	-	-0.715	-
MEII	102847524	1.85	-	-1.714	-
WNPNNKPFQCA	102625984	-1.35	+	0.53	+
VYPK	102487720	-0.65	+	0.518	+
IVGVF	1.02211e+08	3.06	-	-0.443	-
IVQF	99904064	2	-	-0.443	-
FIGGI	99904064	2.2	-	-0.443	-
VIGAF	99904064	2.58	-	-0.477	-
FAPI	97765624	1.88	-	-0.443	-
NDRPSIGNL	96094048	-1.06	+	-0.442	-
MKGSN	95769000	-1.34	+	0.282	+
MWSLL	9.57451e+07	1.56	-	-0.715	-
AIGLN	95150816	1.24	-	-0.392	-
AASGI	94718840	1.38	-	-0.392	-
RHGGS	93189448	-1.86	+	0.594	+
MWFI	92028657	2.08	-	-0.715	-
AIGVI	91835232	2.92	-	-0.392	-
GAPTM	91672992	0.2	-	-0.443	-
MIKI	90790432	1.75	-	0.282	+
FIPVII	90454592	3.15	-	-0.443	-
MWIF	9.04339e+07	2.08	-	-0.715	-
SIFF	90406416	2.33	-	-0.747	-
ISFF	90406416	2.33	-	-0.443	-
SGAAPP	90394520	-0.13	+	-0.747	-
NKGF	90341064	-1.25	+	0.555	+
ISIW	90302592	1.82	-	-0.443	-
KGGGSI	90302592	-0.23	+	0.555	+
KGGRE	89716592	-2.54	+	0.558	+
IVIY	89033649	2.97	-	-0.445	-
APSFI	88902128	1.34	-	-0.392	-
MWPF	88788424	0.55	-	-0.715	-
FISII	8.87496e+07	3.1	-	-0.443	-
GHRNPEEIPW	8.85709e+07	-1.82	+	-1.404	-
MLGALL	88363853	2.45	-	-0.715	-
VLIVGY	86846384	2.5	-	-0.479	-
MYIIL	86823568	2.68	-	-0.718	-
FTII	85792000	2.77	-	-0.443	-
KAGGVI	85215296	0.97	-	0.555	+
MEFF	8.44509e+07	1	-	-1.714	-
VIGVF	84233240	3.06	-	-0.477	-
FGAF	84139136	1.75	-	-0.443	-
MKIGF	83793568	0.98	-	0.282	+
VIIIY	83544096	3.28	-	-0.479	-
LVLLY	83544096	2.86	-	-0.445	-
MVILLY	83544096	2.82	-	-0.718	-
FGGIF	83496856	1.86	-	-0.443	-
NNPFSF	81580440	-0.63	+	-0.443	-
MKVPY	81266952	-0.14	+	0.28	+
YIPK	81144352	-0.57	+	0.552	+
YIKP	81144352	-0.57	+	0.552	+
MKSATQ	8.09393e+07	-0.87	+	0.282	+
FPASI	80780744	1.34	-	-0.443	-
MMIAIS	80780744	2.3	-	-0.715	-
ISIF	79443711	2.75	-	-0.443	-
VIFIP	78217952	2.88	-	-0.477	-
MVTLF	77633526	2.4	-	-0.715	-
TVIF	7.69612e+07	2.7	-	-0.792	-
GGGFK	76535984	-0.46	+	0.555	+
MFGNK	76535984	-0.62	+	0.282	+
MLGLPF	76516091	1.72	-	-0.715	-
YIII	7.64248e+07	3.05	-	-0.445	-
MIITF	7.61938e+07	2.6	-	-0.715	-
IIGGII	7.46402e+07	2.87	-	-0.443	-
MLTFF	74392072	2.12	-	-0.715	-
GLGLEL	73894480	1.18	-	-1.441	-
NQLDQNPRVF	73695360	-1.28	+	-0.442	-
RPSYTNGPQEI	7.33233e+07	-1.54	+	-0.444	-
MILLY	73301314	2.54	-	-0.718	-
VIPQNF	73268216	0.48	-	-0.477	-
TVDEAIQNKRLF	73268216	-0.5	+	-0.793	-
IIGVF	72967340	3.12	-	-0.443	-
VLLPF	7.27794e+07	2.6	-	-0.477	-
FGAVF	72601720	2.24	-	-0.443	-
MHPR	7.25341e+07	-1.85	+	0.321	+
PGGNP	72342848	-1.5	+	-0.099	-
KTPF	71999408	-0.85	+	0.555	+
IKGF	7.19306e+07	0.75	-	0.555	+
MGVLF	70945209	2.46	-	-0.715	-
IGKF	70801056	0.75	-	0.555	+
KTISSEDKPFNL	70731412	-0.92	+	-0.446	-
IAII	70563656	3.83	-	-0.443	-
MFFF	69875088	2.57	-	-0.715	-
WYFRTF	69875088	-0.3	+	0.555	+
FIPVI	69827824	2.88	-	-0.443	-
AIIVP	6.9544e+07	2.68	-	-0.392	-
GVYPGIDIGRDH	68411486	-0.47	+	-1.408	-
GIII	68379784	3.27	-	-0.443	-
IPTWI	67807432	1.16	-	-0.443	-
VGPIPF	67807432	1.32	-	-0.477	-
ITPTF	6.77872e+07	0.86	-	-0.443	-
IPGIY	67408416	1.14	-	-0.445	-
IYAVTP	66961992	1.15	-	-0.445	-
IGFPL	66810068	1.82	-	-0.443	-
MLPLLG	66657924	1.88	-	-0.715	-
MIIVAP	66657924	2.55	-	-0.715	-
IGVII	66172579	3.46	-	-0.443	-
VGAIIY	6.51021e+07	2.22	-	-0.479	-
NNNPF	64603612	-1.86	+	-0.443	-
KPIY	6.41756e+07	-0.57	+	0.552	+
WDEIR	63761820	-1.58	+	-1.441	-
GPMEIR	63761820	-0.6	+	-0.441	-
EGMPIR	63761820	-0.6	+	-0.333	-
GHGDLKDKPWWP	63761820	-1.67	+	-0.41	-
KSIAA	62701184	0.68	-	0.555	+
MKSRV	62701184	-0.62	+	1.282	+
IGVTF	62677264	2.08	-	-0.443	-
RAPVQ	62393988	-0.72	+	0.557	+
ISIYAI	62379980	2.2	-	-0.445	-
KPYI	62361904	-0.57	+	0.552	+
MLVVY	6.16482e+07	2.56	-	-0.718	-
VLPGGI	61543016	1.68	-	-0.477	-
IAIAAP	61543016	2.13	-	-0.443	-
MKVF	60814776	1.25	-	0.282	+
MIAFF	60796664	2.76	-	-0.715	-
VITF	60781812	2.7	-	-0.477	-
KYPI	60496124	-0.58	+	0.552	+
SGKIPDPGSL	59963508	-0.47	+	-0.749	-
VIDF	58931744	2	-	-1.476	-
KSGTT	58931744	-1.3	+	0.555	+
VTIN	5.89018e+07	1.12	-	-0.477	-
IGFP	58837245	1.32	-	-0.443	-
FSVIV	58101856	2.98	-	-0.443	-
MLSGIF	5.80465e+07	1.97	-	-0.715	-
IAVVF	57936805	3.5	-	-0.443	-
YIIPN	57663068	0.52	-	-0.445	-
AVVIL	57650004	3.7	-	-0.392	-
MFLGPI	57355416	1.83	-	-0.715	-
TPDH	56360028	-2.25	+	-1.755	-
DFPALSWLR	5.61816e+07	0.1	-	-0.442	-
IIPF	5.61369e+07	2.55	-	-0.443	-
IVILQ	5.58047e+07	2.7	-	-0.443	-
MVGAPP	5.5795e+07	0.72	-	-0.715	-
GVVLPF	55243152	2.17	-	-0.443	-
AIAPFI	55243152	2.3	-	-0.392	-
FIIN	5.39509e+07	2.08	-	-0.443	-
MLIPF	53778554	2.28	-	-0.715	-
MVYLAP	5.37141e+07	1.47	-	-0.718	-
FGGSG	53667052	0.16	-	-0.443	-
MYLVL	5.30206e+07	2.48	-	-0.718	-
IVIIGA	52928820	3.18	-	-0.443	-
EVFI	5.27413e+07	2	-	-1.333	-
IIGGF	5.25752e+07	2.2	-	-0.443	-
VIYI	52205642	2.97	-	-0.479	-
ITPEKNPQLRDF	52070912	-1.27	+	-0.444	-
VAGGIF	51933986	2.08	-	-0.477	-
LPEGPAVKIG	51917200	0.29	-	-0.444	-
LAIPVNKPGRFE	5.19015e+07	-0.16	+	0.558	+
MIIAI	51819120	3.44	-	-0.715	-
IDIF	51654978	2.08	-	-1.442	-
FIAF	5.1302e+07	2.97	-	-0.443	-
IIVF	51254768	4	-	-0.443	-
FIVGI	50996512	3.12	-	-0.443	-
RPIGGA	50898828	-0.1	+	0.557	+
AVPF	50639929	1.8	-	-0.392	-
GGTVT	50083088	0.4	-	-0.443	-
KTHQ	49946152	-2.83	+	0.592	+
IGII	49752540	3.27	-	-0.443	-
KGGVMI	49664784	0.98	-	0.555	+
KSVVPQ	49435148	-0.23	+	0.555	+
PGVPA	49094208	0.48	-	-0.099	-
KAPRH	4.90112e+07	-2.28	+	1.592	+
YIVI	48161104	2.98	-	-0.445	-
IAVGF	48110756	2.58	-	-0.443	-
MFLLN	48110756	1.76	-	-0.715	-
AIGVF	48110756	2.58	-	-0.392	-
GIGIF	48110756	2.2	-	-0.443	-
VEIF	4.7886e+07	2	-	-1.476	-
GIDRA	4.77058e+07	-0.42	+	-0.442	-
MAPY	47681152	0.2	-	-0.718	-
MGNQY	47681152	-1.36	+	-0.718	-
MANNY	47681152	-0.92	+	-0.718	-
MDIFI	4.76413e+07	2.04	-	-1.715	-
MSFF	4.73573e+07	1.67	-	-0.715	-
MAFY	47326004	1.3	-	-0.718	-
PDGPG	47326004	-1.5	+	-1.098	-
DIFI	47120056	2.08	-	-1.442	-
ITHKI	4.70192e+07	0.24	-	0.592	+
VYVGV	46899072	2.18	-	-0.479	-
FIGSI	46899072	2.12	-	-0.443	-
WGGVI	46523024	1.4	-	-0.443	-
MSIFF	46252676	2.24	-	-0.715	-
MFTFL	46224004	2.12	-	-0.715	-
IGGSPP	46224004	-0.05	+	-0.443	-
VPSGAP	46224004	0.27	-	-0.477	-
PGPVGT	46224004	-0.08	+	-0.099	-
PGASVP	46224004	0.27	-	-0.099	-
KAASI	46218380	0.68	-	0.555	+
ITAGK	46218380	0.26	-	0.555	+
IIGVI	45835767	3.46	-	-0.443	-
IAPIY	45595564	1.58	-	-0.445	-
MTLLI	45194964	2.66	-	-0.715	-
FSPAI	44528914	1.34	-	-0.443	-
FIAI	44302264	3.4	-	-0.443	-
VTVVI	44182348	3.28	-	-0.477	-
ISGFI	44177570	2.12	-	-0.443	-
IKDVFRAIPS	43897780	0.35	-	0.555	+
ISLIY	4.36463e+07	2.14	-	-0.445	-
MKSQDL	43587768	-1	+	-0.717	-
TIVF	43468484	2.7	-	-0.792	-
MFTVL	43468484	2.4	-	-0.715	-
AGVVF	43352108	2.52	-	-0.392	-
IVIIN	43254764	2.84	-	-0.443	-
VIIIN	43254764	2.84	-	-0.477	-
FVVAI	43082340	3.5	-	-0.443	-
MFIPF	4.29984e+07	2.08	-	-0.715	-
IINF	42959652	2.08	-	-0.443	-
EVKAML	42599280	0.72	-	-0.335	-
YVIAI	4.20792e+07	2.74	-	-0.445	-
IIGPI	41519392	2.3	-	-0.443	-
AIII	41444144	3.83	-	-0.392	-
MLALI	41444144	3.16	-	-0.715	-
IIAIL	4.07312e+07	3.82	-	-0.443	-
SVIVEISKEQIR	4.0184e+07	0.12	-	-0.747	-
AGVFF	4.00093e+07	2.24	-	-0.392	-
MSSPH	3.96224e+07	-0.9	+	-0.678	-
FGGGK	39350512	-0.46	+	0.555	+
MISLY	3.9076e+07	1.62	-	-0.718	-
VTILF	3.83656e+07	2.92	-	-0.477	-
IIVNPF	38317068	1.82	-	-0.443	-
IVEISKEQIRAL	38282992	0.3	-	-0.443	-
KSIEF	38086472	-0.18	+	-0.444	-
FPALAG	37690136	1.37	-	-0.443	-
WDSIPIVPIR	37647864	0.48	-	-0.442	-
MALLLF	37630939	2.98	-	-0.715	-
KEIIVQ	37603056	0.38	-	-0.444	-
MLGFF	37596424	2.18	-	-0.715	-
VIIPI	37582168	3.22	-	-0.477	-
FPPPHVIQ	3.70873e+07	0	+	-0.406	-
MFFH	37037168	1.07	-	-0.678	-
YVVI	3.69085e+07	2.9	-	-0.445	-
IVYI	36889920	2.97	-	-0.445	-
VIVF	3.67161e+07	3.92	-	-0.477	-
VVIIP	3.6561e+07	3.16	-	-0.477	-
KPGDHALPIFTG	36485191	-0.2	+	-0.408	-
MVYVL	36336756	2.56	-	-0.718	-
ISGIF	36314452	2.12	-	-0.443	-
VVVSF	3.63004e+07	2.92	-	-0.477	-
FVIV	36285588	3.92	-	-0.443	-
KAASG	36133432	-0.3	+	0.555	+
KDPT	36110628	-2.42	+	-0.445	-
KTPSLF	36059148	-0.07	+	0.555	+
VVIF	36018724	3.92	-	-0.477	-
DYRII	3.59737e+07	-0.06	+	-0.445	-
IAPIF	35640016	2.4	-	-0.443	-
IIIPL	3.54908e+07	3.14	-	-0.443	-
MKYE	35464232	-1.7	+	-0.717	-
KADNFF	35409596	-0.58	+	-0.445	-
GDVWFPQPAPK	35291668	-0.75	+	-0.445	-
VNFGQYPYGGL	35155552	-0.15	+	-0.482	-
MLYVL	35132428	2.48	-	-0.718	-
MYVLI	35132428	2.62	-	-0.718	-
IGGIPI	34977356	1.85	-	-0.443	-
TVIPF	34949008	1.84	-	-0.792	-
VITPF	34949008	1.84	-	-0.477	-
MIEI	3.49296e+07	1.85	-	-1.714	-
IVGF	34788788	2.77	-	-0.443	-
GNAVFDGELRR	3.46511e+07	-0.7	+	-0.441	-
TIVII	3.46165e+07	3.4	-	-0.792	-
KSAAI	34612544	0.68	-	0.555	+
PAAVLF	34556008	2.13	-	-0.099	-
APGLIF	34556008	1.82	-	-0.392	-
VIGIF	3.4448e+07	3.12	-	-0.477	-
IGIF	34071760	2.85	-	-0.443	-
FIISI	34008822	3.1	-	-0.443	-
YVPRDENLGHL	3.38723e+07	-0.88	+	-1.407	-
KSSTK	33720676	-2.02	+	1.552	+
PCLFSP	33653960	0.85	-	-0.123	-
VEACKN	33653960	-0.4	+	-0.503	-
MIIYL	33642921	2.68	-	-0.718	-
ESSYF	33509424	-0.72	+	-1.335	-
KLNECQLNNL	33354702	-0.75	+	-0.468	-
IVAVF	33241842	3.5	-	-0.443	-
TIIII	3.31224e+07	3.46	-	-0.792	-
VIPAF	32891834	2.34	-	-0.477	-
IVPAF	32891834	2.34	-	-0.443	-
PLYSNF	32832582	-0.1	+	-0.101	-
IPALL	32537418	2.46	-	-0.443	-
FGIPI	3.25063e+07	1.96	-	-0.443	-
GVGIF	32397588	2.14	-	-0.443	-
VIAPF	3.21919e+07	2.34	-	-0.477	-
MLVYI	32165984	2.62	-	-0.718	-
VISF	31965154	2.67	-	-0.477	-
KSAVIQ	31963350	0.38	-	0.555	+
GPVIIF	31963350	2.33	-	-0.443	-
FAVI	31757345	3.33	-	-0.443	-
SVIYVT	31655882	1.68	-	-0.749	-
NSII	31453428	1.18	-	-0.443	-
ISGGI	31453428	1.48	-	-0.443	-
PAIIV	31300774	2.68	-	-0.099	-
MKSTML	3.11494e+07	0.37	-	0.282	+
VIIVP	30866976	3.16	-	-0.477	-
KATPF	30728612	-0.32	+	0.555	+
KGHF	30719146	-1.18	+	0.592	+
FEITPEKNPQLR	3.0695e+07	-1.27	+	-0.443	-
FPCSP	30657030	0.26	-	-0.467	-
FCPSP	30657030	0.26	-	-0.467	-
KDCGQ	30657030	-1.76	+	-0.469	-
QMSGGQ	30657030	-1.12	+	-0.443	-
ESSTSP	30657030	-1.37	+	-1.333	-
EDGSSI	30657030	-0.75	+	-2.332	-
MWSF	3.05232e+07	0.75	-	-0.715	-
FVVAV	30487396	3.44	-	-0.443	-
FVVGI	30487396	3.06	-	-0.443	-
TIFF	3.04366e+07	2.35	-	-0.792	-
VFDGELRRGQLL	3.04262e+07	-0.16	+	-0.475	-
SAKDIENLIK	30159720	-0.45	+	-0.75	-
VPAVNF	29847538	1.32	-	-0.477	-
KNPQLRDLDIF	2.97014e+07	-0.83	+	-0.444	-
AIIIF	2.93761e+07	3.62	-	-0.392	-
VNNDDRDSYNL	29231440	-1.78	+	-2.478	-
MAPLFI	29188862	2.2	-	-0.715	-
KMVPVI	28911178	1.55	-	0.555	+
FQVPVI	28911178	1.77	-	-0.443	-
KMVVLP	28911178	1.43	-	0.555	+
EVAGGF	28823862	0.75	-	-1.333	-
ITFF	28168068	2.35	-	-0.443	-
FTIF	28168068	2.35	-	-0.443	-
FITVI	2.79969e+07	3.06	-	-0.443	-
FGVVI	2.78429e+07	3.06	-	-0.443	-
IFSVI	27762680	3.04	-	-0.443	-
YVAII	27762680	2.74	-	-0.445	-
SIIVF	27762680	3.04	-	-0.747	-
GVGIIF	27619237	2.53	-	-0.443	-
FANF	27614944	0.97	-	-0.443	-
FAGGF	27614944	1.32	-	-0.443	-
IGGINI	27578454	1.53	-	-0.443	-
IVPFAL	27470866	2.58	-	-0.443	-
IVLAML	27470866	3.33	-	-0.443	-
GGLSVIKPPTD	27350452	-0.04	+	-0.443	-
WVII	27347136	3.08	-	-0.443	-
WIVI	27347136	3.08	-	-0.443	-
KAAAGI	27347136	0.93	-	0.555	+
VTDF	2.73326e+07	0.7	-	-1.476	-
MKGFDI	27270792	0.23	-	-0.717	-
IPVIP	27251564	2	-	-0.443	-
IGGII	2.7234e+07	2.54	-	-0.443	-
NIFF	27201444	1.65	-	-0.443	-
QVFF	27201444	1.57	-	-0.443	-
IGVF	27109366	2.78	-	-0.443	-
FPVVIL	27054956	2.98	-	-0.443	-
KGGSVS	27014070	-0.35	+	0.555	+
VFRAIPSEVL	26721482	1.09	-	-0.476	-
ISVQ	26628962	1.1	-	-0.443	-
FSAIP	26576734	1.34	-	-0.443	-
AGLIFF	26571048	2.55	-	-0.392	-
PDFKNPIGW	2.65577e+07	-0.9	+	-0.101	-
FGTIF	26428932	1.8	-	-0.443	-
GIVAAI	26374904	2.73	-	-0.443	-
PGVPGS	26358958	-0.1	+	-0.099	-
KAKTT	2.63283e+07	-1.48	+	1.552	+
IIFPI	26320680	2.94	-	-0.443	-
MAFGLP	26142592	1.38	-	-0.715	-
MVVDT	26134022	1.22	-	-1.715	-
MGIPLL	26061574	2	-	-0.715	-
KSVV	26016102	0.93	-	0.555	+
MKATL	26016102	0.58	-	0.282	+
AYFGP	25979582	0.26	-	-0.395	-
FPSGF	25979582	0.56	-	-0.443	-
ENQLDQMPRRF	25971682	-1.78	+	-0.332	-
IYVI	25927196	2.98	-	-0.445	-
AIIII	2.58929e+07	3.96	-	-0.392	-
QYVPVL	25841614	0.97	-	-0.445	-
DVIHDPGRGAPL	25804906	-0.37	+	-1.405	-
IAVVII	25653400	3.95	-	-0.443	-
AIVLVI	25653400	3.83	-	-0.392	-
AIVVII	25653400	3.95	-	-0.392	-
IAVIVL	25653400	3.83	-	-0.443	-
VSFIN	25620472	1.44	-	-0.477	-
EVGKF	25620472	-0.16	+	-0.335	-
FGGRP	25538792	-0.82	+	0.557	+
MGFGPR	25538792	-0.37	+	0.285	+
IGVPI	25278327	2.24	-	-0.443	-
SIVIF	2.51947e+07	3.04	-	-0.747	-
FSGGF	2.50804e+07	0.8	-	-0.443	-
MGILVP	25012277	2.07	-	-0.715	-
PAGAR	24977932	-0.58	+	0.901	+
IGGFF	2.49063e+07	1.86	-	-0.443	-
MKFF	24895466	0.9	-	0.282	+
MVFW	24890952	2	-	-0.715	-
DFYNPKAGRIS	24839491	-0.95	+	0.553	+
MKTTK	2.48338e+07	-1.46	+	1.28	+
PAAIF	24745366	1.86	-	-0.099	-

## Sheet: F4
Sequence	Abundance	Gravy	Hydrophobicity (+) Hydrophilicity (-)	Theoretical charge	Cationic (+) Anionic (-)
MWGPL	1.72141e+09	0.56	-	-0.715	-
MIFF	1.36406e+09	3	-	-0.715	-
FFFP	1.34676e+09	1.7	-	-0.443	-
GPVPGM	1338382080	0.35	-	-0.443	-
MFPF	1.16576e+09	1.47	-	-0.715	-
PGPVG	1.09974e+09	0.04	-	-0.099	-
MWVL	7.29623e+08	2.25	-	-0.715	-
MVYVF	702210560	2.36	-	-0.718	-
MFVF	5.46837e+08	2.92	-	-0.715	-
KAAAAI	455886685	1.3	-	0.555	+
PSPIP	449473248	-0.22	+	-0.099	-
VFIY	403899200	2.55	-	-0.479	-
MVHF	3.75913e+08	1.42	-	-0.678	-
AAPW	374949504	0.28	-	-0.392	-
TPAGAP	3.60205e+08	-0.12	+	-0.792	-
MGGVAP	3.35718e+08	0.92	-	-0.715	-
IKDVFRAIPSE	3.35174e+08	0	+	-0.441	-
FYVFPF	3.32123e+08	1.62	-	-0.445	-
LSPGVH	311367936	0.33	-	-0.406	-
IIFF	299035568	3.65	-	-0.443	-
WIII	2.33725e+08	3.15	-	-0.443	-
PAAPS	219899984	-0.08	+	-0.099	-
APAPS	219899984	-0.08	+	-0.392	-
PAGAP	2.19228e+08	0	+	-0.099	-
PAGPA	212806448	0	+	-0.099	-
PGAAP	212806448	0	+	-0.099	-
YVVIY	207313888	2.06	-	-0.448	-
KGGGI	2.00579e+08	-0.12	+	0.555	+
FPFPRPPH	1.99464e+08	-1.06	+	0.594	+
VDVMQ	198878096	0.66	-	-1.476	-
FDNVP	198878096	-0.32	+	-1.442	-
FDVGGP	198878096	0.18	-	-1.442	-
PGATP	194249872	-0.5	+	-0.099	-
GAPTP	194249872	-0.5	+	-0.443	-
MKSGGG	1.8925e+08	-0.67	+	0.282	+
KGGSG	188286944	-1.18	+	0.555	+
MWWM	187906128	0.5	-	-0.715	-
GPDSY	187906128	-1.52	+	-1.445	-
MFILF	182338229	3.16	-	-0.715	-
AVIF	1.80386e+08	3.33	-	-0.392	-
FIIF	177476592	3.65	-	-0.443	-
MTWF	1.76813e+08	0.77	-	-0.715	-
MWIL	1.69979e+08	2.33	-	-0.715	-
FVVLPA	166672176	2.53	-	-0.443	-
MVGF	1.58243e+08	2.12	-	-0.715	-
IYFP	157280064	1.1	-	-0.445	-
MLYFP	157280064	1.12	-	-0.718	-
MFFY	153018336	1.55	-	-0.718	-
GVGAK	147895072	0.26	-	0.555	+
NGTYF	146094272	-0.62	+	-0.445	-
GNYTF	146094272	-0.62	+	-0.445	-
SVDHGS	146094272	-0.75	+	-1.71	-
NGNEAP	146094272	-1.78	+	-1.441	-
HDSTAA	146094272	-0.77	+	-1.405	-
QPRPIPFPRPQP	1.44232e+08	-1.53	+	1.557	+
WIPF	141882400	1.2	-	-0.443	-
KGGAS	129972000	-0.74	+	0.555	+
FFMI	123718448	3	-	-0.443	-
MFFI	1.1836e+08	3	-	-0.715	-
MPLAF	109846640	1.74	-	-0.715	-
WGAF	1.07166e+08	0.82	-	-0.443	-
PLGWF	102612192	0.74	-	-0.099	-
MMVLG	101816184	2.28	-	-0.715	-
GPASLP	100822712	0.2	-	-0.443	-
IVFY	98823024	2.55	-	-0.445	-
PQSIP	98823024	-0.6	+	-0.099	-
QPPVT	98823024	-0.64	+	-0.443	-
KPAAG	97171280	-0.46	+	0.555	+
RGSGGF	95532704	-0.62	+	0.557	+
IFIF	94442512	3.65	-	-0.443	-
KGGLMQ	94026072	-0.42	+	0.555	+
MFYI	9.09918e+07	1.97	-	-0.718	-
PSAFF	90685800	1	-	-0.099	-
FIIY	9.00281e+07	2.62	-	-0.445	-
MGVPGA	8.9947e+07	0.92	-	-0.715	-
APGTP	89877504	-0.5	+	-0.392	-
IPIIP	88911262	2.06	-	-0.443	-
IIIW	8.49135e+07	3.15	-	-0.443	-
VPFF	83089352	2.05	-	-0.477	-
KSMK	83089352	-1.68	+	1.552	+
KGGTF	83089352	-0.52	+	0.555	+
PAPGAP	83089352	-0.27	+	-0.099	-
FFII	83034080	3.65	-	-0.443	-
MLIFF	83034080	3.16	-	-0.715	-
MFFIL	83034080	3.16	-	-0.715	-
IDFSI	82406568	1.5	-	-1.442	-
MFLSVE	82406568	1.4	-	-1.712	-
IYII	82344142	3.05	-	-0.445	-
MISFF	8.01681e+07	2.24	-	-0.715	-
MSGNR	74513808	-1.46	+	0.285	+
FSFPF	73301904	1.2	-	-0.443	-
MYFF	72800952	1.55	-	-0.718	-
MFYF	72800952	1.55	-	-0.718	-
MFIVF	69413504	3.24	-	-0.715	-
IPSPQ	69004952	-0.6	+	-0.443	-
PVNKPGRYDDF	6.73973e+07	-1.53	+	-0.103	-
IGGPVP	65076644	0.78	-	-0.443	-
VPPGGI	65076644	0.78	-	-0.477	-
PVPGGL	65076644	0.67	-	-0.099	-
HVAVI	64983236	2.3	-	-0.406	-
VGAW	62907920	1.18	-	-0.477	-
FISF	6.26659e+07	2.33	-	-0.443	-
FPFPRPPHQ	6.20575e+07	-1.33	+	0.594	+
MIIW	61262231	2.5	-	-0.715	-
EIFNAH	60670072	-0.18	+	-1.296	-
FDPAVT	60242384	0.5	-	-1.442	-
TKFEEINKVLF	6.00144e+07	-0.08	+	-0.794	-
KGGGAI	5.99317e+07	0.2	-	0.555	+
TLPGAP	5.92043e+07	0.22	-	-0.792	-
YFMI	58997280	1.97	-	-0.445	-
CPPSI	58997280	0.6	-	-0.467	-
EVENI	58974684	-0.36	+	-2.331	-
PIGATP	58180144	0.33	-	-0.099	-
PIASAP	58180144	0.68	-	-0.099	-
MTRI	58071448	0.3	-	0.285	+
MYSF	5.73555e+07	0.65	-	-0.718	-
PGSGPP	56647872	-1.07	+	-0.099	-
YREWPF	5.59915e+07	-1.5	+	-0.444	-
KNGGIP	55716385	-0.88	+	0.555	+
ISYF	54588484	1.3	-	-0.445	-
FGIF	5.40733e+07	2.42	-	-0.443	-
MFGIF	5.36489e+07	2.32	-	-0.715	-
DERQFPFPRPPH	5.34591e+07	-1.96	+	-0.404	-
FYIP	52862832	1.1	-	-0.445	-
KNVGAP	5.24001e+07	-0.57	+	0.555	+
MIVMI	5.15016e+07	3.4	-	-0.715	-
AKVINDRFGIVE	49066124	0.23	-	-0.391	-
NFGKFF	48752496	0.1	-	0.555	+
GPPNAP	47978447	-1.15	+	-0.443	-
MFFSI	47615628	2.24	-	-0.715	-
ASAPAP	47615628	0.23	-	-0.392	-
GEQPRPFPFPRP	4.75773e+07	-1.57	+	0.559	+
KDPVP	47570486	-1.28	+	-0.445	-
EIRAP	47452536	-0.66	+	-0.333	-
MIWLF	46472580	2.42	-	-0.715	-
DASAIL	46400724	1.27	-	-1.442	-
IDVDVPVVGGHA	46400724	0.88	-	-2.405	-
WGSSE	45509364	-1.28	+	-1.439	-
AGTGME	45509364	-0.22	+	-1.389	-
AGGTME	45509364	-0.22	+	-1.389	-
YAPN	45225588	-1.15	+	-0.445	-
EQPRPIPFPRP	4.42385e+07	-1.52	+	0.667	+
MYAW	44114856	0.38	-	-0.718	-
YAMP	44114856	0.2	-	-0.445	-
MFEW	44114856	0.07	-	-1.714	-
FGSGN	44114856	-0.46	+	-0.443	-
NGGSF	44114856	-0.46	+	-0.443	-
FGGSN	44114856	-0.46	+	-0.443	-
WPGINN	43287864	-0.9	+	-0.443	-
KAGDD	43057004	-1.9	+	-1.443	-
EVGSN	43057004	-0.8	+	-1.333	-
EVGSGG	43057004	-0.22	+	-1.333	-
VGADGS	43057004	0.15	-	-1.476	-
FGGFF	41934678	1.52	-	-0.443	-
YGGIF	40741344	1.04	-	-0.445	-
TKPTLPFPWLPE	39725848	-0.47	+	-0.791	-
WSAGF	3.90543e+07	0.5	-	-0.443	-
WDLRPL	3.90282e+07	-0.48	+	-0.442	-
SGGWREDIRVA	38990492	-0.73	+	-0.745	-
KNGTY	36650984	-1.96	+	0.552	+
GKGGTY	36650984	-1.18	+	0.552	+
PGLAEN	36001324	-0.57	+	-1.098	-
VIIW	3.59336e+07	3.07	-	-0.477	-
MVDQF	35829508	0.38	-	-1.715	-
APISAP	35159812	0.68	-	-0.392	-
PGIATP	35159812	0.33	-	-0.099	-
FAGF	34753256	1.75	-	-0.443	-
FVGPI	34267958	1.9	-	-0.443	-
KGGGCV	34168568	0.27	-	0.53	+
MVSFL	3.40922e+07	2.38	-	-0.715	-
EVAGPA	33882864	0.38	-	-1.333	-
EGSSPI	33850632	-0.43	+	-1.333	-
FGGDAP	33663932	-0.22	+	-1.442	-
MENHH	3.36342e+07	-2.3	+	-1.641	-
FIGF	33478096	2.42	-	-0.443	-
DPKVP	32992020	-1.28	+	-0.445	-
PAGLTP	32992020	0.22	-	-0.099	-
SVPPI	3.20753e+07	0.94	-	-0.747	-
PVNKPGRYDDFF	32068865	-1.17	+	-0.103	-
WAFGP	31873962	0.34	-	-0.443	-
IPII	31557170	2.98	-	-0.443	-
MIPLI	31557170	2.62	-	-0.715	-
IPIVP	3.12801e+07	2	-	-0.443	-
APFFG	31077048	1.08	-	-0.392	-
APFGF	31077048	1.08	-	-0.392	-
MATFSI	30975474	1.58	-	-0.715	-
ADPQPE	30960782	-1.98	+	-2.389	-
WSIII	3.0308e+07	2.36	-	-0.443	-
MLPVIP	30221276	1.87	-	-0.715	-
PAGGTP	30018448	-0.48	+	-0.099	-
APGGTP	30018448	-0.48	+	-0.392	-
FVNF	29575856	1.57	-	-0.443	-
IGFPV	29565586	1.9	-	-0.443	-
MKNEF	28912424	-1.24	+	-0.716	-
APLRQE	28639998	-1.25	+	-0.389	-
LPGGGF	28416482	0.63	-	-0.443	-
DVGMR	28286992	-0.46	+	-0.442	-
GEQPRPFPFPR	2.76547e+07	-1.56	+	0.559	+
FGIAP	27430626	1.42	-	-0.443	-
IYVIF	27391564	2.94	-	-0.445	-
LPSQPI	27391564	0.13	-	-0.443	-
YVVIF	27160676	2.88	-	-0.445	-
MFSY	2.69808e+07	0.65	-	-0.718	-
KMIY	26892380	0.3	-	0.552	+
DHFVKR	2.67486e+07	-1.35	+	0.592	+
DSGPF	26683942	-0.7	+	-1.442	-
PVDP	26101076	-0.62	+	-1.098	-
DEQPRPIPFPRP	2.60102e+07	-1.68	+	-0.441	-
PVNMI	25905802	1.1	-	-0.099	-
GLHLPSYSPYPQ	25678841	-0.71	+	-0.411	-
KPGRYDDFF	25318996	-1.46	+	-0.447	-
YPPF	2.47596e+07	-0.43	+	-0.445	-
FTFPF	2.47086e+07	1.22	-	-0.443	-
KAAQ	2.46114e+07	-0.95	+	0.555	+
MYAY	24507950	0.27	-	-0.72	-
MESSQ	24380452	-1.34	+	-1.714	-
MLGIW	24273657	1.78	-	-0.715	-
KDAEEW	24128702	-2.25	+	-2.442	-
MAGPI	24124450	1.24	-	-0.715	-
IAIW	23818078	2.48	-	-0.443	-
EGGVAP	23806498	0.02	-	-1.333	-
WGGDI	23484512	-0.14	+	-1.442	-
KDDII	23467420	-0.38	+	-1.444	-
FFGAI	23078264	2.3	-	-0.443	-
MVLIW	2.27312e+07	2.7	-	-0.715	-
IGPW	22578170	0.4	-	-0.443	-
IPGW	22578170	0.4	-	-0.443	-
MELALP	2.25737e+07	1.03	-	-1.714	-
IVGII	2.25342e+07	3.46	-	-0.443	-
APTNP	22451742	-1.12	+	-0.392	-
LPVDV	22398090	1.42	-	-1.442	-
KTGGA	22318072	-0.72	+	0.555	+
FGVF	22209536	2.35	-	-0.443	-
MYIYI	22101276	1.66	-	-0.72	-
AGTMAP	21769586	0.47	-	-0.392	-
VAGGME	21769586	0.6	-	-1.474	-
FDGAGP	21769586	-0.22	+	-1.442	-
EGMH	2.16627e+07	-1.3	+	-1.296	-
ITEIAG	21520004	1.03	-	-1.441	-
MEQKKA	21520004	-1.85	+	0.281	+
MMGVF	21220174	2.08	-	-0.715	-
FIDHS	21134696	-0.04	+	-1.405	-
HSDIF	21134696	-0.04	+	-1.405	-
EVFSH	21134696	-0.1	+	-1.296	-
MILAW	2.10809e+07	2.22	-	-0.715	-
DAVIP	21019866	1.08	-	-1.442	-
QPRPIPFPRP	2.10191e+07	-1.32	+	1.557	+
EGAFG	20904036	0.06	-	-1.333	-
RYDDFF	2.06927e+07	-1.2	+	-1.444	-
LAGGGK	20660231	0.08	-	0.555	+
MLVML	20604504	3.12	-	-0.715	-
MKSGLS	20604504	-0.03	+	0.282	+
VAGPF	20466504	1.36	-	-0.477	-
MYII	2.03863e+07	2.4	-	-0.718	-
KPPF	2.01645e+07	-1.07	+	0.555	+
RATR	20154358	-1.98	+	1.557	+
HGTE	20010328	-1.95	+	-1.403	-
FAGAA	19777874	1.56	-	-0.443	-
GAPR	19708522	-1.18	+	0.557	+
RSPEDSIIFR	1.95471e+07	-0.74	+	-0.441	-
YVDIP	19527052	0.46	-	-1.445	-
MDVYPL	19527052	0.58	-	-1.717	-
EGHM	19247048	-1.3	+	-1.296	-
FFAF	19098512	2.55	-	-0.443	-
PTPF	18883432	-0.28	+	-0.099	-
QPAQP	18669228	-1.68	+	-0.443	-
IPVSVSTPGKF	18565658	0.54	-	0.555	+
VDMP	1.81303e+07	0.25	-	-1.476	-
FGGFP	17508580	0.64	-	-0.443	-
KSDTSK	17407535	-2.27	+	0.553	+
TIWIL	17237628	2.24	-	-0.792	-
FGPVLL	17237628	2.1	-	-0.443	-
EIAEP	17088450	-0.46	+	-2.331	-
SIPFF	17033532	1.54	-	-0.747	-
KAGGAQ	16959278	-0.77	+	0.555	+
FYII	16934606	2.62	-	-0.445	-
IVGVPL	1.68893e+07	2.45	-	-0.443	-
MVPTPQ	16679174	-0.22	+	-0.715	-
WIAI	16552977	2.48	-	-0.443	-
KAAAAA	16552977	0.85	-	0.555	+
KGGAGI	16552977	0.2	-	0.555	+
KNDPP	16444228	-2.82	+	-0.445	-
MGVFTF	16444228	1.77	-	-0.715	-
HFKGPI	16332205	-0.3	+	0.592	+
KTKAP	16152467	-1.66	+	1.552	+
MFSW	1.60549e+07	0.75	-	-0.715	-
GVAGAK	15884877	0.52	-	0.555	+
FTIW	1.58166e+07	1.42	-	-0.443	-
WAIP	15647037	0.95	-	-0.443	-
QIEGP	15567233	-0.9	+	-1.441	-
PPGVN	15456346	-0.58	+	-0.099	-
MNSDP	15428556	-1.5	+	-1.715	-
MQGNGG	15428556	-1.05	+	-0.715	-
MTGAI	15398647	1.42	-	-0.715	-
MFFP	1.53801e+07	1.47	-	-0.715	-
PSVGPV	15371328	0.67	-	-0.099	-
APIIW	15350848	1.66	-	-0.392	-
MAPLTF	14904988	1.33	-	-0.715	-
MNGQI	14883586	-0.2	+	-0.715	-
YSGGIKLPTD	14831885	-0.43	+	-0.446	-
MFSIF	1.48206e+07	2.24	-	-0.715	-
QGGGP	14724886	-1.26	+	-0.443	-
FVVI	14681328	3.92	-	-0.443	-
IVPAW	1.46804e+07	1.6	-	-0.443	-
ISTPI	1.45183e+07	1.18	-	-0.443	-
MFPFG	14493211	1.1	-	-0.715	-
FPGSAKDIENL	1.4425e+07	-0.39	+	-1.443	-
GVIW	14421954	1.85	-	-0.443	-
KPVM	14421954	0.15	-	0.555	+
IGRE	14421954	-0.98	+	-0.439	-
MVGLW	14421954	1.72	-	-0.715	-
MIERG	14421954	-0.4	+	-0.714	-
KGAAAG	14421954	0.12	-	0.555	+
MFTFF	14409633	1.92	-	-0.715	-
DTKFEEINKVL	14384478	-0.65	+	-1.445	-
FGSNRFETL	14260220	-0.44	+	-0.441	-
MAPFF	14156138	1.54	-	-0.715	-
TVTIP	14026547	1.14	-	-0.792	-
ISPTI	14026547	1.18	-	-0.443	-
PVPGIG	13949194	0.78	-	-0.099	-
LHLPSYSPYPQ	1.38115e+07	-0.74	+	-0.411	-
DKVFMQ	13561944	-0.33	+	-0.445	-
SEDDVF	13489986	-0.72	+	-3.745	-
KAGAAL	13484324	0.82	-	0.555	+
VIIIW	1.34755e+07	3.36	-	-0.477	-
GGSVLW	13327347	0.92	-	-0.443	-
FGFPF	13314026	1.28	-	-0.443	-
MIHPS	13299598	0.16	-	-0.678	-
GVPPN	13294061	-0.58	+	-0.443	-
EHVV	13276289	0.43	-	-1.296	-
QTPPF	13218370	-0.92	+	-0.443	-
WSTVP	13218370	0.04	-	-0.443	-
VNFGQYPYGGF	13127674	-0.24	+	-0.482	-
RAAGAR	12791945	-0.67	+	1.557	+
RAGAAR	12791945	-0.67	+	1.557	+
WPSMI	12766485	0.62	-	-0.443	-
YRPRTDIPGVVE	12724241	-0.73	+	-0.441	-
FVVAW	12644124	2.42	-	-0.443	-
MVKPF	12644124	0.68	-	0.282	+
MSFYI	12616376	1.42	-	-0.718	-
WEVLIR	1.26012e+07	0.6	-	-0.441	-
WSII	1.24904e+07	1.82	-	-0.443	-
FPAF	12465549	1.45	-	-0.443	-
MAFFP	12465549	1.54	-	-0.715	-
PPGGGP	12465549	-1	+	-0.099	-
MEIF	12441729	1.42	-	-1.714	-
MKSDT	12441729	-1.4	+	-0.717	-
RPSYTNGPQEIY	12377852	-1.52	+	-0.446	-
KGGNF	1.23428e+07	-1.08	+	0.555	+
MKMQM	12137473	-0.34	+	0.282	+
HADPN	12137473	-2	+	-1.405	-
MVGW	12058516	1.2	-	-0.715	-
ALWPF	1.19973e+07	1.18	-	-0.392	-
MFVLW	1.19002e+07	2.36	-	-0.715	-
MTAPL	11849518	1.04	-	-0.715	-
QPSGSV	11849518	-0.48	+	-0.443	-
MQSDF	11703408	-0.62	+	-1.715	-
HDMP	11700638	-1.6	+	-1.405	-
FMMA	11700638	2.1	-	-0.443	-
KAMF	11595007	0.65	-	0.555	+
MWLY	11521229	0.88	-	-0.718	-
TTGPVP	11349452	-0.13	+	-0.792	-
FVDSI	11312522	1.44	-	-1.442	-
DWYKGPTLL	11202515	-0.52	+	-0.447	-
MPPDV	1.11509e+07	-0.12	+	-1.715	-
ALVAPE	11083528	1.08	-	-1.389	-
IAPADI	11083528	1.25	-	-1.442	-
NPPR	11023130	-2.8	+	0.557	+
MIFGSL	10898763	1.97	-	-0.715	-
QGGAI	10855644	0.4	-	-0.443	-
APGGGK	10839114	-0.82	+	0.605	+
ITTGPL	10811020	0.82	-	-0.443	-
IDGIAL	10811020	1.78	-	-1.442	-
PADSTF	10766890	-0.33	+	-1.098	-
GEQPRPFPF	10749636	-1.23	+	-0.441	-
DIDGIF	10734450	0.73	-	-2.442	-
EGDVIF	10734450	0.68	-	-2.332	-
PVVYTA	10628095	1.1	-	-0.101	-
MSLLW	10624321	1.56	-	-0.715	-
KSGGGI	10624321	-0.23	+	0.555	+
FDPAIN	10487375	0.08	-	-1.442	-
MQPH	10433941	-1.6	+	-0.678	-
SVIDII	10358635	2.23	-	-1.746	-
VISLVE	10358635	2.07	-	-1.474	-
LVSVEI	10358635	2.07	-	-1.441	-
WGVI	10356352	1.85	-	-0.443	-
QVGGIF	10272618	1.2	-	-0.443	-
FIYF	1.02579e+07	2.2	-	-0.445	-
EPGLEE	10214033	-1.45	+	-3.328	-
VPGVF	10204848	1.84	-	-0.477	-
ERFIPA	10187463	-0.08	+	-0.333	-
IVSMDG	10128246	0.98	-	-1.442	-
EVPVVE	10023572	0.67	-	-2.329	-
WVPF	9.96719e+06	1.12	-	-0.443	-
WTIF	9.96135e+06	1.42	-	-0.443	-
MQPF	9.91853e+06	-0.1	+	-0.715	-
MFSFF	9839767	1.9	-	-0.715	-
FPIFY	9812638	1.44	-	-0.445	-
FDPSP	9.79266e+06	-0.94	+	-1.442	-
HVVI	9755427	2.42	-	-0.406	-
IVGEVI	9739611	2.25	-	-1.441	-
GVIEVI	9739611	2.25	-	-1.441	-
MPGGVP	9570978	0.35	-	-0.715	-
MIYI	9.56683e+06	2.4	-	-0.718	-
GGAPF	9.51837e+06	0.44	-	-0.443	-
FISY	9511495	1.3	-	-0.445	-
FGWDKDLAK	9419689	-0.86	+	-0.447	-
YLVAGM	9338911	1.67	-	-0.445	-
MNAPN	9325668	-0.98	+	-0.715	-
NGAGP	9325668	-0.82	+	-0.443	-
GPAGGG	9325668	-0.23	+	-0.443	-
GGGAGP	9325668	-0.23	+	-0.443	-
MIHF	9297493	1.5	-	-0.678	-
WVVF	9266553	2.58	-	-0.443	-
MAIAPF	9.23817e+06	1.87	-	-0.715	-
ESAAII	9149821	1.38	-	-1.333	-
FIPI	9143466	2.55	-	-0.443	-
SIYHHY	9133572	-0.88	+	-0.679	-
FGGW	9123268	0.28	-	-0.443	-
AGPQMI	9071169	0.45	-	-0.392	-
PTGAP	9009678	-0.5	+	-0.099	-
WIIAI	8.99071e+06	2.88	-	-0.443	-
VPVYST	8898667	0.67	-	-0.479	-
MSVLYL	8.83823e+06	1.93	-	-0.718	-
EVTAF	8788655	0.92	-	-1.333	-
MFITL	8740348	2.46	-	-0.715	-
KALDMF	8736450	0.48	-	-0.445	-
PVGVSP	8736174	0.67	-	-0.099	-
AKGGV	8669128	0.26	-	0.605	+
IVSVVP	8658917	2.45	-	-0.443	-
YHPYN	8652555	-2.18	+	-0.411	-
SVIIY	8646742	2.22	-	-0.749	-
FVMSI	8624596	2.52	-	-0.443	-
MIPLF	8622334	2.28	-	-0.715	-
KAGAPL	8578401	0.25	-	0.555	+
MKAQP	8573284	-1.06	+	0.282	+
YVGY	8534050	0.3	-	-0.448	-
MISFY	8500767	1.42	-	-0.718	-
VAGIW	8473557	1.84	-	-0.477	-
MEEDD	8440947	-2.42	+	-4.711	-
MCACP	8440947	1.42	-	-0.764	-
MMATK	8427428	0.2	-	0.282	+
MSSVD	8.37932e+06	0.2	-	-1.713	-
GPPVGM	8.37416e+06	0.35	-	-0.443	-
VEFLDL	8342206	1.27	-	-2.475	-
EVCPAG	8302928	0.5	-	-1.357	-
MWVLP	8.29118e+06	1.48	-	-0.715	-
TVDH	8.28264e+06	-0.8	+	-1.755	-
KPDGP	8221084	-2.2	+	-0.445	-
APAIVF	8.21807e+06	2.25	-	-0.392	-
FLGLAP	8.21807e+06	1.7	-	-0.443	-
MTPFF	8.18557e+06	1.04	-	-0.715	-
KPTLPFPWLPE	8.15238e+06	-0.45	+	-0.442	-
FPAIAM	8101252	1.87	-	-0.443	-
IPVTW	8.09235e+06	1.1	-	-0.443	-
KSTPF	8.0606e+06	-0.84	+	0.555	+
MLLHHL	8059954	1.15	-	-0.642	-
WIGIF	8038433	2.1	-	-0.443	-
MIKPF	8038433	0.74	-	0.282	+
KPRAH	8036818	-2.28	+	1.592	+
MMTML	8.02849e+06	1.76	-	-0.715	-
FGQYPY	8006823	-0.88	+	-0.448	-
FYIF	7.9985e+06	2.2	-	-0.445	-
VTCLP	7.9985e+06	1.64	-	-0.501	-
SAAMLP	7.9985e+06	1.15	-	-0.747	-
GTAAK	7.98409e+06	-0.28	+	0.555	+
KDYLVF	7968307	0.35	-	-0.447	-
QTDIIF	7.9588e+06	0.68	-	-1.442	-
WSPA	7.88561e+06	-0.38	+	-0.443	-
WASP	7.88561e+06	-0.38	+	-0.443	-
KGNAII	7.87998e+06	0.5	-	0.555	+
MEPSAM	7.85573e+06	-0.05	+	-1.714	-
GGESSN	7.85573e+06	-1.57	+	-1.441	-
MDAIR	7854160	0.04	-	-0.715	-
WIPI	7.83152e+06	1.62	-	-0.443	-
MAAAAP	7777366	1.25	-	-0.715	-
KFEEINKVLF	7764932	-0.02	+	-0.445	-
MTPP	7732145	-0.5	+	-0.715	-
VMGGAP	7.72128e+06	0.92	-	-0.477	-
KIPDWF	7.68716e+06	-0.43	+	-0.445	-
MATNI	7.59567e+06	0.8	-	-0.715	-
HVNPQR	7587364	-2.02	+	0.594	+
FPRHPP	7587364	-1.62	+	0.594	+
MYPF	7.58342e+06	0.45	-	-0.718	-
FPFNF	7.56357e+06	0.66	-	-0.443	-
MPTHR	7.53612e+06	-1.62	+	0.321	+
FAPLAI	7527128	2.18	-	-0.443	-
MSMIW	7507353	1.32	-	-0.715	-
FGILVP	7.49568e+06	2.22	-	-0.443	-
NFLEFR	7484616	-0.35	+	-0.441	-
MANTF	7.40897e+06	0.46	-	-0.715	-
WSIP	7.39788e+06	0.3	-	-0.443	-
KSHAGG	7372051	-1.15	+	0.592	+
DAPDP	7363633	-1.68	+	-2.442	-
WILIQ	7.27714e+06	1.68	-	-0.443	-
MNMC	7208944	0.7	-	-0.74	-
HCGNP	7.1545e+06	-1.24	+	-0.43	-
APGSAP	7.10887e+06	-0.13	+	-0.392	-
VVEDLPEGPAVK	7.07033e+06	0.02	-	-2.477	-
WGSF	7.0675e+06	0.17	-	-0.443	-
MVVFY	7005704	2.36	-	-0.718	-
HDGAH	7.00327e+06	-1.7	+	-1.369	-
FDPAGI	6.99386e+06	0.6	-	-1.442	-
KDSMP	6984872	-1.58	+	-0.445	-
FVAEP	6984383	0.74	-	-1.441	-
FGMMP	6.93506e+06	0.92	-	-0.443	-
MIRTE	6.89369e+06	-0.46	+	-0.712	-
WSNII	6.89366e+06	0.76	-	-0.443	-
FPGGF	6893146	0.64	-	-0.443	-
GGIKLPRDVIST	6.87943e+06	0.1	-	0.555	+
WSAF	6.82596e+06	0.72	-	-0.443	-
FGDF	6.81158e+06	0.42	-	-1.442	-
FTGFPF	6.78824e+06	0.95	-	-0.443	-
PSPTPF	6760566	-0.58	+	-0.099	-
HPGE	6.75681e+06	-2.18	+	-1.403	-
IVGIW	6.7439e+06	2.38	-	-0.443	-
LVGGNK	6.7439e+06	-0.03	+	0.555	+
KYPY	6.67773e+06	-2.03	+	0.55	+
VIPW	6.61961e+06	1.55	-	-0.477	-
FTGPI	6613619	0.92	-	-0.443	-
FFPNF	6.60768e+06	0.66	-	-0.443	-
MKGW	6.58855e+06	-0.82	+	0.282	+
ESFGI	6586800	0.52	-	-1.333	-
FGAHF	6.51845e+06	0.76	-	-0.406	-
FAMTY	6511718	0.9	-	-0.445	-
MFGW	6.51163e+06	0.85	-	-0.715	-
MVPW	6.4843e+06	0.9	-	-0.715	-
WIIA	6475670	2.48	-	-0.443	-
QGRGAP	6.46814e+06	-1.43	+	0.557	+
EGDITL	6.45895e+06	0.03	-	-2.332	-
KQPQYAPLPIE	6444877	-0.95	+	-0.444	-
YIKDVFRAIPSE	6441582	-0.11	+	-0.444	-
MKMIY	6.43013e+06	0.62	-	0.28	+
MWPI	6.35472e+06	0.97	-	-0.715	-
MMETF	6329307	0.48	-	-1.714	-
VIGPF	6.31523e+06	1.9	-	-0.477	-
FIAP	6.27972e+06	1.88	-	-0.443	-
YVAGF	6255252	1.42	-	-0.445	-
IPAF	6.22941e+06	1.88	-	-0.443	-
PIAF	6.22941e+06	1.88	-	-0.099	-
MASAKA	6.22941e+06	0.43	-	0.282	+
KVINDRFGIVE	6.22331e+06	0.08	-	-0.441	-
MATSH	6.21644e+06	-0.2	+	-0.678	-
IITLW	6.21088e+06	2.24	-	-0.443	-
PVLEPE	6.18367e+06	-0.37	+	-2.094	-
MHYF	6.14586e+06	0.05	-	-0.681	-
YTTI	6126791	0.45	-	-0.445	-
IGAF	6109129	2.17	-	-0.443	-
MCHP	6.08715e+06	-0.1	+	-0.703	-
KPGGGL	6079972	-0.48	+	0.555	+
KDDGE	6.07311e+06	-2.96	+	-2.441	-
KDGDE	6.07311e+06	-2.96	+	-2.441	-
SPLSMI	6069311	1.17	-	-0.747	-
AIYPF	6.0627e+06	1.24	-	-0.395	-
EGPR	6044269	-2.5	+	-0.333	-
MAPPE	6.00459e+06	-0.6	+	-1.712	-
MWDI	5.9618e+06	0.5	-	-1.715	-
FPFY	5.95746e+06	0.67	-	-0.445	-
KGGGSH	5.94649e+06	-1.52	+	0.592	+
MGPML	5.88527e+06	1.12	-	-0.715	-
MQWH	5860987	-1.43	+	-0.678	-
VSLVVE	5840485	2.02	-	-1.474	-
VLSVEV	5840485	2.02	-	-1.476	-
ISPTAI	5.78843e+06	1.28	-	-0.443	-
KGMT	5780329	-0.77	+	0.555	+
MGKMT	5780329	-0.24	+	0.282	+
RVVGDPFKGGIE	5.7474e+06	-0.21	+	-0.441	-
YVFY	5.7208e+06	1.1	-	-0.448	-
MHHTF	5.69637e+06	-0.48	+	-0.642	-
MHACVP	5.69637e+06	0.93	-	-0.703	-
IGMI	5695207	2.62	-	-0.443	-
QDDNPF	5659770	-2.13	+	-2.442	-
MEPCP	5.65359e+06	-0.46	+	-1.738	-
MCCCNE	5.64795e+06	0.4	-	-1.785	-
VPVEI	5.63356e+06	1.56	-	-1.476	-
MMMSG	5624836	0.9	-	-0.715	-
APGPIW	5590979	0.3	-	-0.392	-
WSTPN	5576569	-1.5	+	-0.443	-
WNVI	5.55789e+06	1.07	-	-0.443	-
GVGIW	5.55789e+06	1.4	-	-0.443	-
FIFPF	5.51483e+06	2.26	-	-0.443	-
PIDDLL	5.49536e+06	0.58	-	-2.098	-
ITWPI	5327119	1.16	-	-0.443	-
NEPWWP	5320833	-2	+	-1.441	-
VIDVI	5309138	2.78	-	-1.476	-
GPAPRP	5.29802e+06	-1.32	+	0.557	+
EVVLAP	5216653	1.48	-	-1.333	-
LVPGEL	5216653	1.05	-	-1.441	-
KDMHGQ	5213137	-2.1	+	-0.408	-
MCCG	5.19701e+06	1.62	-	-0.764	-
MWNPL	5178918	-0.06	+	-0.715	-
KPNGAP	5.16552e+06	-1.53	+	0.555	+
NYIF	5.14396e+06	0.62	-	-0.445	-
FISSF	5113304	1.7	-	-0.443	-
FPGIF	5.10032e+06	1.62	-	-0.443	-
TIISP	5082219	1.18	-	-0.792	-
ISIIW	5.08058e+06	2.36	-	-0.443	-
KNGISI	5.08058e+06	0.07	-	0.555	+
QTTQ	5.06295e+06	-2.1	+	-0.443	-
PTPY	5.06295e+06	-1.3	+	-0.101	-
